# Supplementary material for: Radical pathways for the formation of non-canonical nucleobases in prebiotic environments
Source: Royal Society of Chemistry journal article supplement (doi:10.1039/c9ra08001e), 2019-01-01
Supplement: c9ra08001e1.pdf [file c9ra08001e1.pdf]

## Supporting Information

to

### Radical Pathways for the Formation of Non-Canonical Nucleobases in Prebiotic Environment

Sarabjeet Kaur<sup>a</sup> and Purshotam Sharma\*<sup>a</sup>

<sup>a</sup>*Computational Biochemistry Laboratory, Department of Chemistry and Centre for Advanced Studies in Chemistry, Panjab University, Chandigarh, 160014, India.*

*E-mail: psharma@pu.ac.in*

The supporting information includes:

|                                                                                                                                                                                 |         |
|---------------------------------------------------------------------------------------------------------------------------------------------------------------------------------|---------|
| <b>Figure S1.</b> Radical-assisted pathway for the formation of CA.....                                                                                                         | S2      |
| <b>Figure S2.</b> Radical-assisted pathway for the formation of MM.....                                                                                                         | S3      |
| <b>Figure S3.</b> Radical-assisted pathway for the formation of BA.....                                                                                                         | S4      |
| <b>Figure S4.</b> Radical-assisted pathway for the formation of TAP.....                                                                                                        | S5      |
| <b>Figure S5.</b> Structures of the two conformers of <b>20</b> .....                                                                                                           | S6      |
| <b>Table S1.</b> Relative energies of structures of CA, MM, BA and TAP mechanisms.....                                                                                          | S7-S8   |
| <b>Table S2.</b> Absolute differences of the B3LYP/6-311G(d,p) & M06-2X/6-311G(d,p) relative energies of the various species associated with CA, MM, BA and TAP mechanisms..... | S9-10   |
| <b>Table S3-S10.</b> Cartesian coordinates of the optimized species for various mechanisms....                                                                                  | S11-S45 |

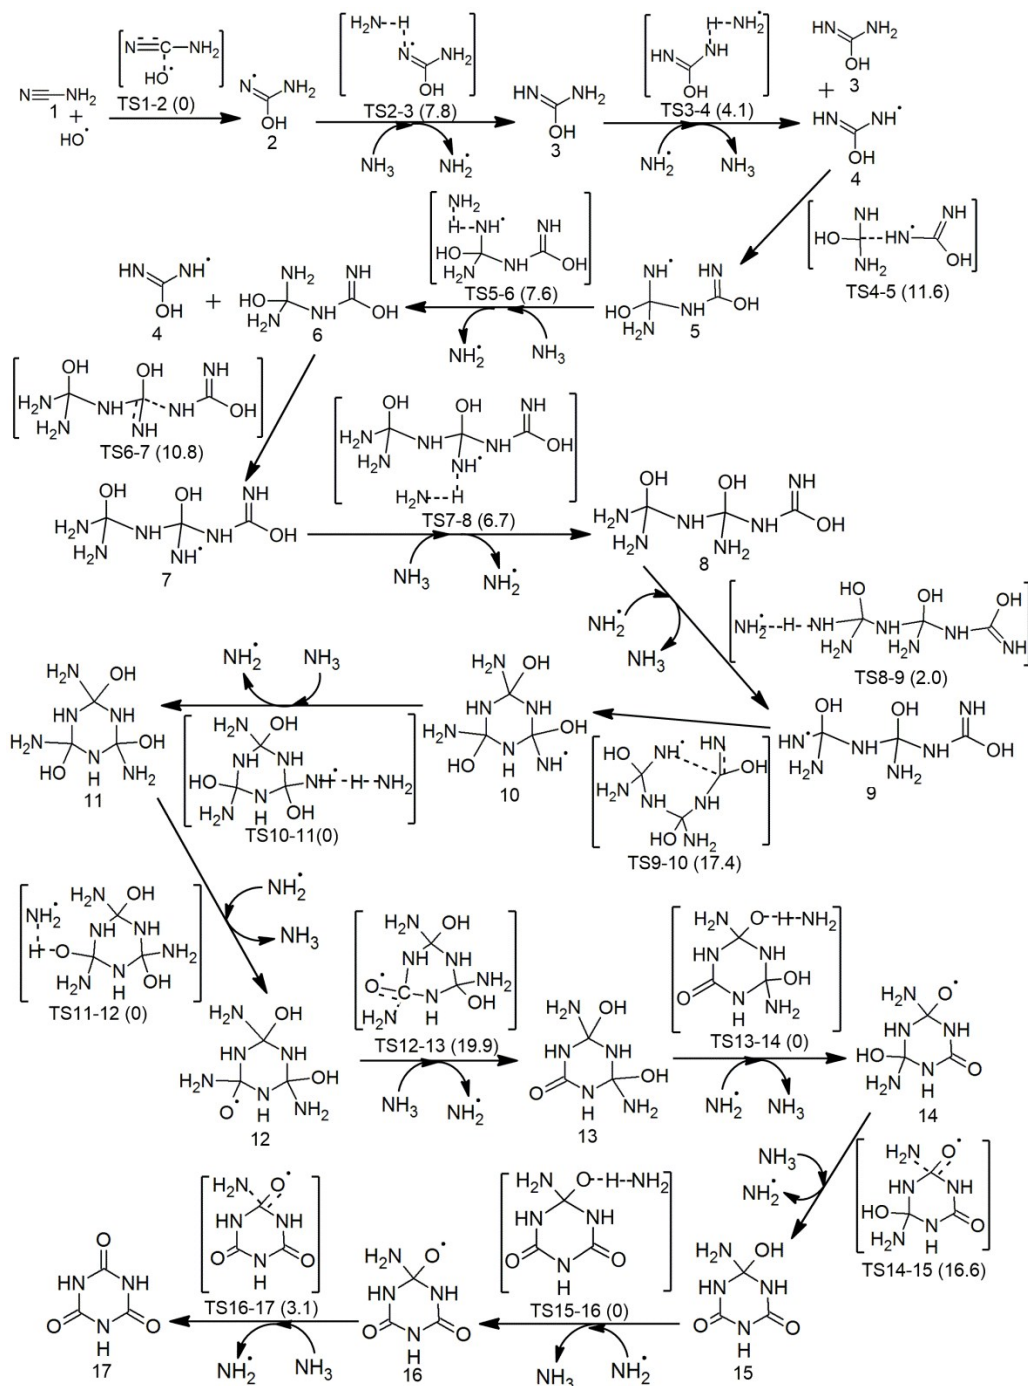

**Figure S1.** Proposed radical mechanism along with corresponding transition states (TSs) for the formation of cyanuric acid (**17**) from cyanamide (**1**). Gas phase B3LYP/6-311G(d,p) relative electronic energies (kcal mol<sup>-1</sup>) of the TSs (barriers) with respect to reactants of each step are provided in parenthesis.

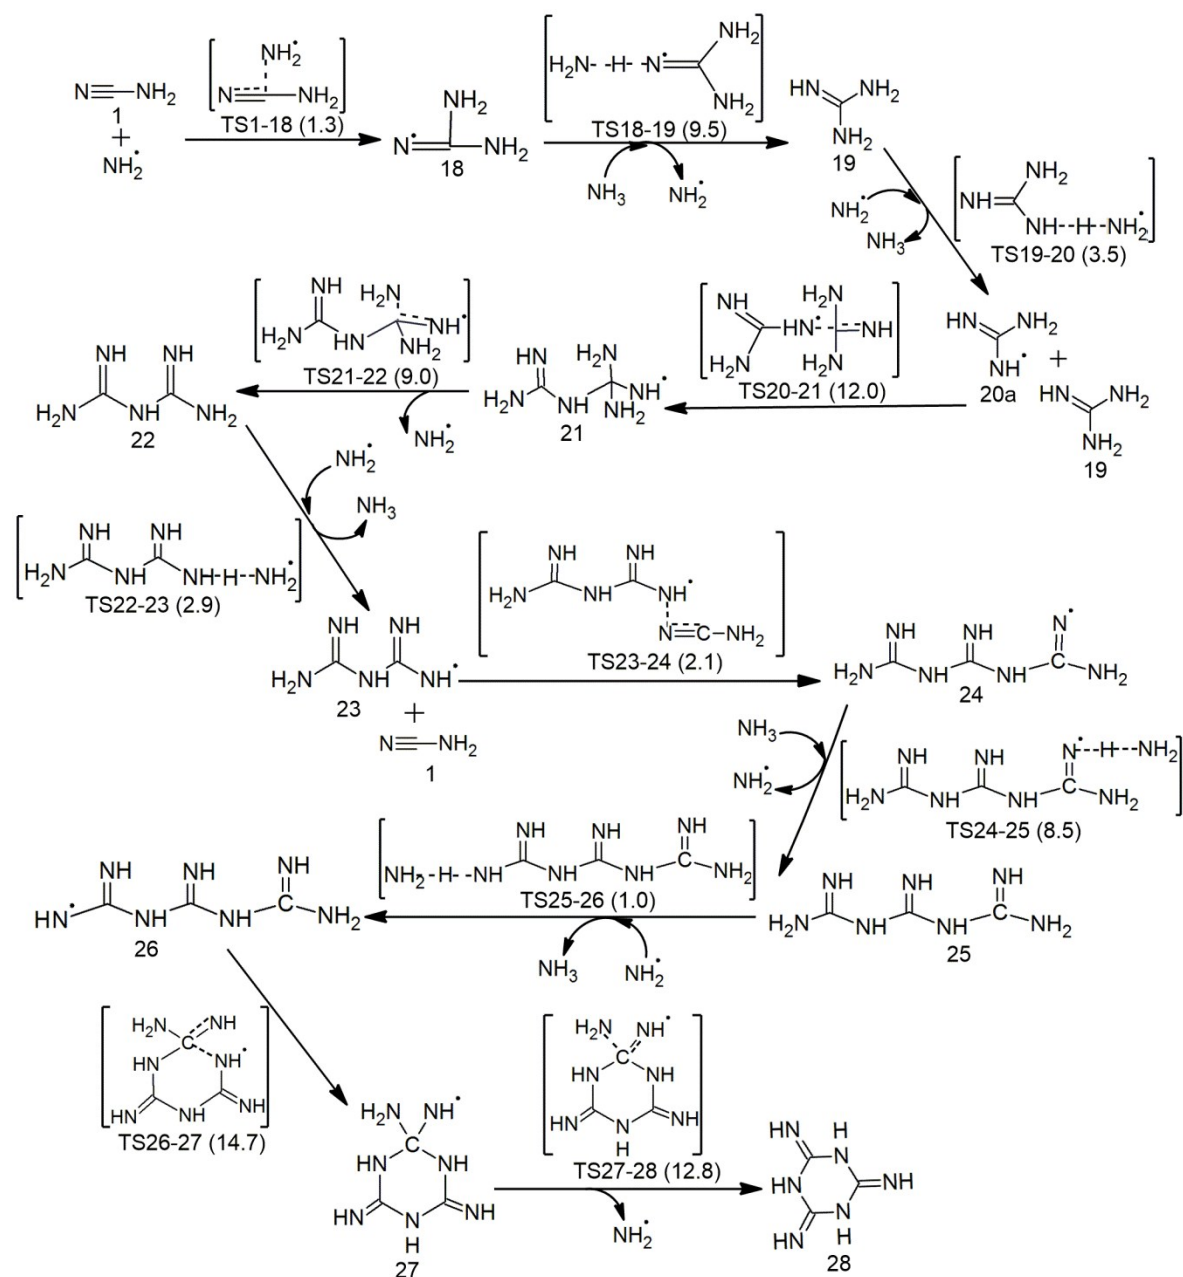

**Figure S2.** Proposed radical mechanism along with corresponding transition states (TSs) for the formation of melamine (**28**) from cyanamide (**1**). Gas phase B3LYP/6–311G(d,p) relative electronic energies (kcal mol<sup>-1</sup>) of the TSs (barriers) with respect to reactants of each step are provided in parenthesis.

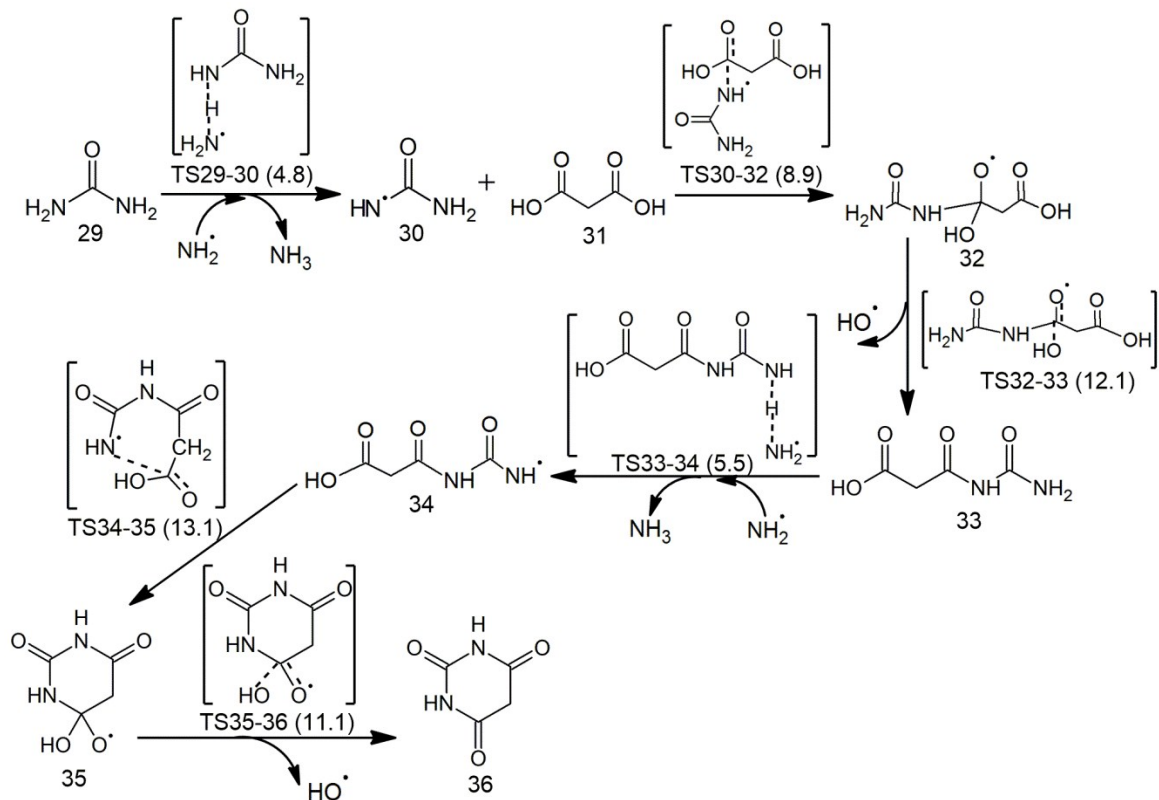

**Figure S3.** Proposed radical mechanism along with corresponding transition states (TSs) for the formation of barbituric acid (**30**) from urea (**23**) and malonic acid (**25**). Gas phase B3LYP/6-311G(d,p) relative electronic energies (kcal mol<sup>-1</sup>) of the TSs (barriers) with respect to reactants of each step are provided in parenthesis.

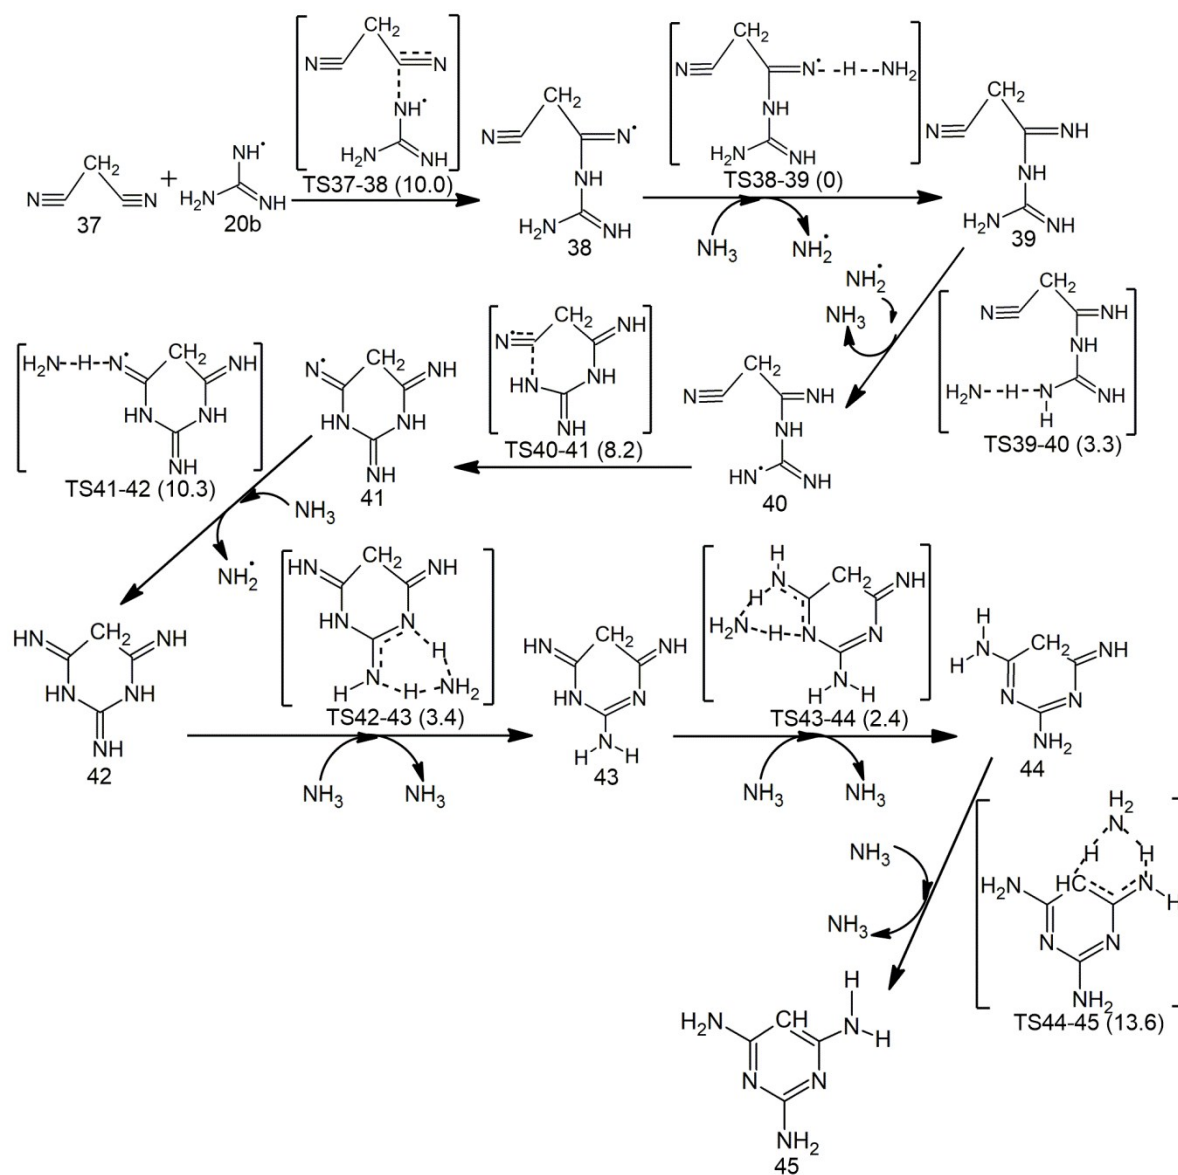

**Figure S4.** Proposed radical mechanism along with corresponding transition states (TSs) for the formation of 2,4,6-triaminopyrimidine (**45**) from malononitrile (**37**) and **20b**. Gas phase B3LYP/6-311G(d,p) relative electronic energies (kcal mol<sup>-1</sup>) of the TSs (barriers) with respect to reactants of each step are provided in parenthesis.

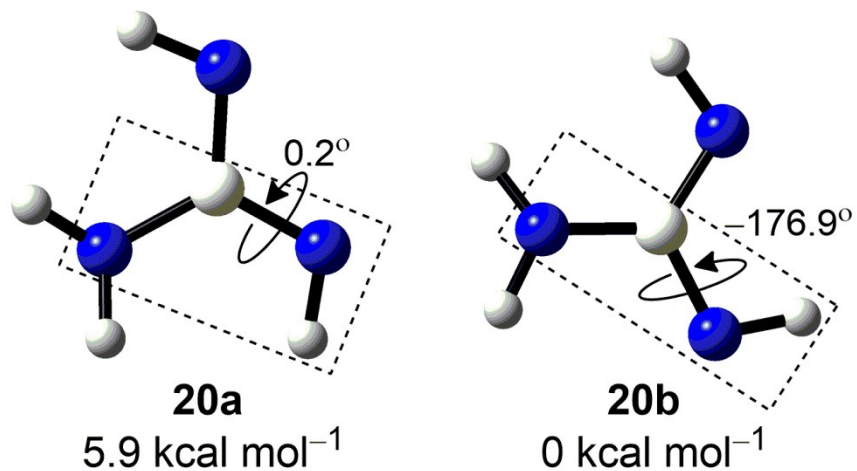

**Figure S5.** Structures of the two conformers of **20** (**a** and **b**) optimized at B3LYP/6-311G(d,p) and used in the formation pathways of MM (**20a**) and TAP (**20b**). The atoms used to define the dihedral angle are shown within the box.

**Table S1.** Relative electronic energies (in kcal mol<sup>-1</sup>) of the various transition states (TS) and the corresponding products (P) associated with proposed mechanisms obtained using different functionals and 6-311G(d,p) basis set.<sup>a</sup>

| Conversion                  | Relative energy (kcal mol <sup>-1</sup> ) |       |                |       |        |       |        |       |
|-----------------------------|-------------------------------------------|-------|----------------|-------|--------|-------|--------|-------|
|                             | B3LYP                                     |       | $\omega$ B97XD |       | M06-2X |       | B2PLYP |       |
|                             | TS                                        | P     | TS             | P     | TS     | P     | TS     | P     |
| <b>1+•OH→2</b>              | 0                                         | -31.8 | 0              | -34.9 | 0.5    | -32.9 | 4.2    | -27.7 |
| <b>2→3</b>                  | 7.8                                       | 7.5   | 9.6            | 7.4   | 10.2   | 6.6   | 9.7    | 6.6   |
| <b>3→4</b>                  | 4.1                                       | -2.4  | 6.3            | -5.5  | 7.9    | -6.2  | 8.1    | -0.1  |
| <b>4+3→5</b>                | 11.6                                      | -0.5  | 7.5            | -3.6  | 14.2   | -4.5  | 12.8   | -2.7  |
| <b>5→6</b>                  | 7.6                                       | 3.7   | 7.4            | 2.7   | 8.0    | 2.2   | 9.8    | 2.3   |
| <b>6+4→7</b>                | 10.8                                      | 6.4   | 11.8           | 0.9   | 12.5   | -0.5  | 8.4    | 5.4   |
| <b>7→8</b>                  | 6.7                                       | 3.8   | 6.5            | 2.7   | 7.6    | 2.6   | 10.4   | 8.0   |
| <b>8→9</b>                  | 2.0                                       | -5.2  | 3.4            | -3.7  | 4.6    | -6.6  | 8.2    | -8.7  |
| <b>9→10</b>                 | 17.4                                      | 5.9   | 19.0           | -0.3  | 13.3   | 0.6   | 22.1   | -1.0  |
| <b>10→11</b>                | 0                                         | 3.6   | 1.3            | 5.5   | 4.1    | 6.9   | 4.2    | 5.8   |
| <b>11→12</b>                | 0                                         | -8.5  | 1.5            | -5.9  | 0      | -2.6  | 0.9    | -1.9  |
| <b>12→13</b>                | 19.9                                      | -14.2 | 14.9           | -10.3 | 18.4   | -9.8  | 15.6   | -20.2 |
| <b>13→14</b>                | 0                                         | -9.8  | 0              | -7.3  | 2.8    | -3.9  | 0      | -3.1  |
| <b>14→15</b>                | 16.6                                      | -10.2 | 15.2           | -6.9  | 14.0   | -6.1  | 21.6   | -15.5 |
| <b>15→16</b>                | 0                                         | -10.7 | 0              | -7.9  | 0      | -4.9  | 2.3    | -4.3  |
| <b>16→17</b>                | 3.1                                       | -11.8 | 4.9            | -8.3  | 4.4    | -8.8  | 5.3    | -17.0 |
| <b>1+•NH<sub>2</sub>→18</b> | 1.2                                       | -23.4 | 1.3            | -27.6 | 2.3    | -25.5 | 7.5    | -21.8 |
| <b>18→19</b>                | 9.5                                       | 9.3   | 11.1           | 9.0   | 11.8   | 8.3   | 16.4   | 8.1   |
| <b>19→20a</b>               | 3.4                                       | -2.4  | 7.8            | -2.5  | 6.6    | -5.5  | 9.7    | 0.0   |
| <b>20a+19→21</b>            | 12.0                                      | 1.0   | 9.6            | -6.2  | 12.7   | -4.8  | 17.7   | -1.1  |
| <b>21→22</b>                | 10.4                                      | -1.5  | 15.1           | 3.7   | 16.7   | 5.7   | 16.9   | -0.7  |
| <b>22→23</b>                | 2.8                                       | 1.2   | 4.0            | 2.8   | 6.8    | -3.6  | 9.1    | -3.0  |
| <b>23→24</b>                | 2.1                                       | -13.8 | 0              | -19.2 | 9.2    | -11.3 | 8.7    | -6.8  |
| <b>24→25</b>                | 8.5                                       | 8.2   | 10.0           | 7.9   | 10.7   | 7.1   | 12.5   | 7.1   |
| <b>25→26</b>                | 1.0                                       | -4.1  | 1.7            | -2.8  | 2.2    | -1.9  | 6.9    | -1.8  |
| <b>26→27</b>                | 14.7                                      | -6.0  | 15.6           | -10.5 | 15.7   | -11.2 | 20.3   | -8.8  |
| <b>27→28</b>                | 12.8                                      | 1.2   | 16.9           | 7.2   | 17.7   | 7.6   | 18.1   | -0.4  |

|                  | Relative energy (kcal mol <sup>-1</sup> ) |       |        |       |        |       |        |       |
|------------------|-------------------------------------------|-------|--------|-------|--------|-------|--------|-------|
|                  | B3LYP                                     |       | ωB97XD |       | M06-2X |       | B2PLYP |       |
| Conversion       | TS                                        | P     | TS     | P     | TS     | P     | TS     | P     |
| <b>29→30</b>     | 4.8                                       | 2.4   | 6.9    | 0.8   | 8.0    | 1.8   | 6.6    | 2.3   |
| <b>30+31→32</b>  | 8.9                                       | 5.8   | 9.0    | 2.9   | 8.3    | -0.9  | 12.8   | 7.4   |
| <b>32→33</b>     | 12.1                                      | 7.7   | 14.3   | 9.5   | 18.2   | 12.8  | 18.7   | 10.9  |
| <b>33→34</b>     | 5.5                                       | 2.1   | 8.9    | 3.4   | 7.0    | 3.3   | 5.1    | 4.6   |
| <b>34→35</b>     | 13.1                                      | 1.5   | 16.6   | -0.7  | 16.8   | -1.1  | 19.0   | 0.2   |
| <b>35→36</b>     | 11.1                                      | 5.2   | 13.7   | 7.3   | 15.9   | 8.8   | 15.3   | 0.1   |
| <b>37+20b→38</b> | 10.0                                      | -9.6  | 7.5    | -13.6 | 6.1    | -14.5 | 16.5   | -9.0  |
| <b>38→39</b>     | 0                                         | 10.8  | 6.7    | 7.2   | 6.9    | 8.8   | 6.4    | 9.9   |
| <b>39→40</b>     | 3.3                                       | -8.3  | 5.0    | -6.9  | 6.0    | -5.3  | 8.4    | -6.4  |
| <b>40→41</b>     | 8.2                                       | -13.3 | 10.0   | -16.3 | 10.3   | -14.8 | 14.0   | -13.4 |
| <b>41→42</b>     | 10.3                                      | 9.5   | 11.5   | 9.1   | 12.4   | 8.6   | 13.0   | 8.3   |
| <b>42→43</b>     | 3.4                                       | -2.7  | 2.5    | -2.5  | 1.4    | -2.8  | 9.1    | -2.9  |
| <b>43→44</b>     | 2.4                                       | -6.2  | 1.5    | -5.9  | 0.8    | -5.5  | 8.4    | -6.0  |
| <b>44→45</b>     | 13.6                                      | -20.2 | 12.2   | -20.8 | 11.6   | -21.0 | 19.4   | -21.9 |

<sup>a</sup>Each reactant is considered in its free optimized state while calculating the electronic energies.



**Table S2.** Absolute differences of the gas phase B3LYP/6–311G(d,p) and M06-2X/6–311G(d,p) relative electronic energies of transition states (TS) and the corresponding products (P) energies associated with the steps of the proposed mechanisms of CA, MM, BA and TAP.

| Conversion                  | B3LYP/6–311G(d,p) |       | M06–2X/6–311G(d,p) |       | Abs[TS(B3LYP)–TS(M06–2X)] | Abs[P(B3LYP)–P(M06–2X)] |
|-----------------------------|-------------------|-------|--------------------|-------|---------------------------|-------------------------|
|                             | TS                | P     | TS                 | P     |                           |                         |
| <b>1+•OH→2</b>              | 0                 | -31.8 | 0.5                | -32.9 | 0.5                       | 1.1                     |
| <b>2→3</b>                  | 7.8               | 7.5   | 10.2               | 6.6   | 2.4                       | 0.9                     |
| <b>3→4</b>                  | 4.1               | -2.4  | 7.9                | -6.2  | 3.8                       | 3.8                     |
| <b>4+3→5</b>                | 11.6              | -0.5  | 14.2               | -4.5  | 2.6                       | 4.0                     |
| <b>5→6</b>                  | 7.6               | 3.7   | 8.0                | 2.2   | 0.4                       | 1.5                     |
| <b>6+4→7</b>                | 10.8              | 6.4   | 12.5               | -0.5  | 1.7                       | 6.9                     |
| <b>7→8</b>                  | 6.7               | 3.8   | 7.6                | 2.6   | 0.9                       | 1.2                     |
| <b>8→9</b>                  | 2.0               | -5.2  | 4.6                | -6.6  | 2.6                       | 1.4                     |
| <b>9→10</b>                 | 17.4              | 5.9   | 13.3               | 0.6   | 4.1                       | 5.3                     |
| <b>10→11</b>                | 0                 | 3.6   | 4.1                | 6.9   | 4.1                       | 3.3                     |
| <b>11→12</b>                | 0                 | -8.5  | 0                  | -2.6  | 0                         | 5.9                     |
| <b>12→13</b>                | 19.9              | -14.2 | 18.4               | -9.8  | 1.5                       | 4.4                     |
| <b>13→14</b>                | 0                 | -9.8  | 2.8                | -3.9  | 2.8                       | 5.9                     |
| <b>14→15</b>                | 16.6              | -10.2 | 14.0               | -6.1  | 2.6                       | 4.1                     |
| <b>15→16</b>                | 0                 | -10.7 | 0                  | -4.9  | 0                         | 5.8                     |
| <b>16→17</b>                | 3.1               | -11.8 | 4.4                | -8.8  | 1.3                       | 3.0                     |
| <b>1+•NH<sub>2</sub>→18</b> | 1.2               | -23.4 | 2.3                | -25.5 | 1.1                       | 2.1                     |
| <b>18→19</b>                | 9.5               | 9.3   | 11.8               | 8.3   | 2.3                       | 1.0                     |
| <b>19→20a</b>               | 3.4               | -2.4  | 6.6                | -5.5  | 3.2                       | 3.1                     |
| <b>20a+19→21</b>            | 12.0              | 1.0   | 12.7               | -4.8  | 0.7                       | 5.8                     |
| <b>21→22</b>                | 10.4              | -1.5  | 16.7               | 5.7   | 6.3                       | 7.2                     |
| <b>22→23</b>                | 2.8               | 1.2   | 6.8                | -3.6  | 4.0                       | 4.8                     |
| <b>23→24</b>                | 2.1               | -13.8 | 9.2                | -11.3 | 7.1                       | 2.5                     |
| <b>24→25</b>                | 8.5               | 8.2   | 10.7               | 7.1   | 2.2                       | 1.1                     |
| <b>25→26</b>                | 1.0               | -4.1  | 2.2                | -1.9  | 1.2                       | 2.2                     |
| <b>26→27</b>                | 14.7              | -6.0  | 15.7               | -11.2 | 1.0                       | 5.2                     |
| <b>27→28</b>                | 12.8              | 1.2   | 17.7               | 7.6   | 4.9                       | 6.4                     |
| <b>29→30</b>                | 4.8               | 2.4   | 8.0                | 1.8   | 3.2                       | 0.6                     |
| <b>30+31→32</b>             | 8.9               | 5.8   | 8.3                | -0.9  | 0.6                       | 6.7                     |
| <b>32→33</b>                | 12.1              | 7.7   | 18.2               | 12.8  | 6.1                       | 5.1                     |
| <b>33→34</b>                | 5.5               | 2.1   | 7.0                | 3.3   | 1.5                       | 1.2                     |
| <b>34→35</b>                | 13.1              | 1.5   | 16.8               | -1.1  | 3.7                       | 2.6                     |
| <b>35→36</b>                | 11.1              | 5.2   | 15.9               | 8.8   | 4.8                       | 3.6                     |
| <b>37+20b→38</b>            | 10.0              | -9.6  | 6.1                | -14.5 | 3.9                       | 4.9                     |

|              |      |       |      |       |     |     |
|--------------|------|-------|------|-------|-----|-----|
| <b>38→39</b> | 0    | 10.8  | 6.9  | 8.8   | 6.9 | 2.0 |
| <b>39→40</b> | 3.3  | -8.3  | 6.0  | -5.3  | 2.7 | 3.0 |
| <b>40→41</b> | 8.2  | -13.3 | 10.3 | -14.8 | 2.1 | 1.5 |
| <b>41→42</b> | 10.3 | 9.5   | 12.4 | 8.6   | 2.1 | 0.9 |
| <b>42→43</b> | 3.4  | -2.7  | 1.4  | -2.8  | 2.0 | 0.1 |
| <b>43→44</b> | 2.4  | -6.2  | 0.8  | -5.5  | 1.6 | 0.7 |
| <b>44→45</b> | 13.6 | -20.2 | 11.6 | -21.0 | 2.0 | 0.8 |

**Table S3. B3LYP/6–311G(d,p) cartesian coordinates for the optimized structures of CA mechanism.**

| Cartesian coordinates for <b>1</b> (cyanamide) |             |             |             |
|------------------------------------------------|-------------|-------------|-------------|
| C                                              | 0.22085300  | -0.00006000 | -0.00201100 |
| N                                              | 1.37784600  | 0.00002100  | 0.01343800  |
| N                                              | -1.11864400 | 0.00000600  | -0.08096000 |
| H                                              | -1.56987200 | -0.84484800 | 0.24238400  |
| H                                              | -1.56965800 | 0.84501300  | 0.24233800  |
| Cartesian coordinates for <b>2</b>             |             |             |             |
| C                                              | -0.03601600 | 0.15252100  | -0.00656700 |
| N                                              | -0.41098300 | 1.36449200  | 0.02125300  |
| N                                              | 1.26588700  | -0.29809100 | -0.07922100 |
| H                                              | 1.96227400  | 0.41109600  | 0.09435300  |
| H                                              | 1.43216400  | -1.16831600 | 0.40721000  |
| O                                              | -0.91949700 | -0.88840200 | -0.01528600 |
| H                                              | -1.80669700 | -0.51550300 | 0.06590000  |
| Cartesian coordinates for <b>3</b>             |             |             |             |
| C                                              | -0.05101600 | -0.10005300 | -0.00477800 |
| N                                              | -0.69794300 | -1.19456600 | 0.01688800  |
| N                                              | 1.31996600  | -0.05580300 | -0.07266200 |
| H                                              | 1.77215200  | -0.92990200 | 0.14054700  |
| H                                              | 1.75920800  | 0.77189600  | 0.29686900  |
| O                                              | -0.54614000 | 1.17893100  | -0.00646700 |
| H                                              | -1.50586400 | 1.13370000  | 0.04923000  |
| H                                              | -1.70444500 | -1.05424200 | -0.01582800 |
| Cartesian coordinates for <b>4</b>             |             |             |             |
| C                                              | 0.01802900  | -0.10375100 | -0.00058500 |
| N                                              | -0.96508700 | -0.97785300 | 0.00019300  |
| N                                              | 1.27216100  | -0.55190500 | 0.00011200  |
| H                                              | 1.90039700  | 0.25717900  | 0.00010800  |
| O                                              | -0.14951300 | 1.26203000  | 0.00003800  |
| H                                              | -1.08644200 | 1.48769200  | 0.00045700  |
| H                                              | -1.87554400 | -0.51029700 | 0.00050900  |
| Cartesian coordinates for <b>5</b>             |             |             |             |
| C                                              | 1.08912600  | -0.02805400 | -0.01490600 |
| N                                              | 1.19506900  | 0.98528500  | -1.03509900 |
| N                                              | 1.40654300  | 0.57529700  | 1.25417900  |
| H                                              | 2.39947400  | 0.77755100  | 1.29252000  |
| H                                              | 1.16660900  | -0.06193000 | 2.00623200  |
| O                                              | 1.96711300  | -1.09476600 | -0.35018900 |
| H                                              | 2.33416500  | -0.85948400 | -1.21079400 |
| H                                              | 0.37942200  | 1.59678200  | -0.88439900 |
| C                                              | -1.43849100 | 0.00691900  | 0.00571000  |
| N                                              | -0.23812200 | -0.65053800 | 0.05935400  |
| N                                              | -1.54950900 | 1.27205000  | -0.09560300 |
| H                                              | -2.51279100 | 1.59009700  | -0.05028100 |

|   |             |             |             |
|---|-------------|-------------|-------------|
| O | -2.44700200 | -0.91710300 | 0.08230500  |
| H | -3.28587900 | -0.46555800 | -0.05844700 |
| H | -0.24356400 | -1.63034700 | -0.17640100 |

Cartesian coordinates for **6**

|   |             |             |             |
|---|-------------|-------------|-------------|
| C | 1.05472900  | -0.05201800 | 0.01241500  |
| N | 1.25777100  | 1.04508900  | -0.90124000 |
| N | 1.33372600  | 0.44047200  | 1.33314700  |
| H | 2.23190200  | 0.90909200  | 1.35377100  |
| H | 1.31424000  | -0.31750300 | 2.00470500  |
| O | 1.87136700  | -1.14756000 | -0.41169500 |
| H | 2.73958700  | -0.76921000 | -0.58922900 |
| H | 0.58320000  | 1.77177400  | -0.66842000 |
| C | -1.45014600 | 0.01206700  | 0.00650600  |
| N | -0.27216100 | -0.67615000 | 0.01523500  |
| N | -1.53563500 | 1.28471300  | -0.01523600 |
| H | -2.49560200 | 1.60856100  | 0.06220500  |
| O | -2.48684300 | -0.88961600 | 0.02329300  |
| H | -3.30996100 | -0.40483600 | -0.09625500 |
| H | -0.30237300 | -1.64625400 | -0.25392400 |
| H | 1.04940800  | 0.72663100  | -1.84251200 |

Cartesian coordinates for **7**

|   |             |             |             |
|---|-------------|-------------|-------------|
| C | 1.61599800  | -0.49033000 | -0.07131100 |
| C | -1.86513000 | -0.62444300 | 0.02700700  |
| C | -0.19508700 | 1.27384600  | -0.01803700 |
| N | -1.33248300 | 0.48864400  | -0.57510100 |
| N | 1.11933800  | 0.83990700  | -0.38437700 |
| N | 0.92007200  | -1.52599400 | -0.84202600 |
| H | 1.39891600  | 1.17679800  | -1.29557000 |
| H | 1.24141200  | -2.43574600 | -0.52136100 |
| H | -1.26970700 | 0.38598700  | -1.57978800 |
| N | -1.69859000 | -0.91168900 | 1.25985700  |
| H | -2.24224500 | -1.71854200 | 1.55294500  |
| N | -0.30077800 | 1.43436400  | 1.41449600  |
| H | -1.30074400 | 1.48181700  | 1.63627500  |
| N | 1.50473500  | -0.86101800 | 1.31643600  |
| H | 1.79367100  | -0.06923800 | 1.88222600  |
| H | 0.52978000  | -1.04885200 | 1.54768900  |
| O | -2.62574400 | -1.30063500 | -0.88244700 |
| H | -2.92428300 | -2.12363600 | -0.48161500 |
| O | 2.99369600  | -0.39633800 | -0.42070300 |
| H | 3.41978700  | -1.12623500 | 0.04292800  |
| O | -0.29735000 | 2.55967900  | -0.61625500 |
| H | -1.22778400 | 2.80851600  | -0.56365300 |
| H | 1.19563500  | -1.43645300 | -1.81579400 |

Cartesian coordinates for **8**

|   |            |             |             |
|---|------------|-------------|-------------|
| C | 1.58601500 | -0.53793600 | -0.08411700 |
|---|------------|-------------|-------------|

|   |             |             |             |
|---|-------------|-------------|-------------|
| C | -1.85050800 | -0.65493600 | 0.06148400  |
| C | -0.18160600 | 1.30089800  | -0.01390100 |
| N | -1.34664800 | 0.51057300  | -0.47042700 |
| N | 1.14382700  | 0.83106900  | -0.33697200 |
| N | 0.86767800  | -1.49883000 | -0.92221100 |
| H | 1.43203500  | 1.15777900  | -1.25005200 |
| H | 1.15233200  | -2.43706200 | -0.65564200 |
| H | -1.40085100 | 0.51392600  | -1.47881100 |
| N | -1.67411800 | -1.06332500 | 1.25576600  |
| H | -2.18964900 | -1.92066300 | 1.43822600  |
| N | -0.28083700 | 1.49963800  | 1.39782400  |
| H | -1.22692400 | 1.67034800  | 1.71267900  |
| N | 1.45695200  | -0.99402000 | 1.27402700  |
| H | 1.84177000  | -0.27934800 | 1.88249200  |
| H | 0.46791300  | -1.08314600 | 1.51462800  |
| O | -2.63012800 | -1.24601300 | -0.89943500 |
| H | -2.95760100 | -2.08188900 | -0.55262500 |
| O | 2.97321000  | -0.46359600 | -0.41483300 |
| H | 3.35934200  | -1.26550800 | -0.04436500 |
| O | -0.26042300 | 2.50028600  | -0.79880000 |
| H | -1.12834200 | 2.87949800  | -0.62158600 |
| H | 1.14100000  | -1.35548400 | -1.88972200 |
| H | 0.35631900  | 2.23224000  | 1.68246900  |

Cartesian coordinates for **9**

|   |             |             |             |
|---|-------------|-------------|-------------|
| C | 1.70893000  | -0.54416700 | -0.16366900 |
| C | -1.93117400 | -0.68258500 | 0.01313000  |
| C | -0.18958300 | 1.22728100  | 0.06117100  |
| N | -1.40907300 | 0.51475900  | -0.39868400 |
| N | 1.10056300  | 0.78191600  | -0.39313100 |
| N | 1.06820400  | -1.50888400 | -1.02281500 |
| H | 1.29166100  | 1.10045200  | -1.33445200 |
| H | 0.29776800  | -1.89978600 | -0.46889400 |
| H | -1.68331400 | 0.78440400  | -1.33171100 |
| N | -1.43781600 | -1.42597800 | 0.92509900  |
| H | -2.03402100 | -2.22091400 | 1.13982000  |
| N | -0.20946200 | 1.27287800  | 1.48902400  |
| H | 0.52523600  | 1.88371700  | 1.82240500  |
| H | -1.11348700 | 1.54077200  | 1.85701500  |
| N | 1.72784500  | -1.00772400 | 1.19616000  |
| H | 2.29958700  | -0.38472700 | 1.75630300  |
| H | 0.78429800  | -1.03755400 | 1.57712900  |
| O | -3.06627400 | -0.92323100 | -0.71878500 |
| H | -3.35217300 | -1.82795800 | -0.55327400 |
| O | 3.03271600  | -0.33279600 | -0.60830600 |
| H | 3.34431900  | -1.19937700 | -0.89370200 |
| O | -0.29915000 | 2.50097000  | -0.59030100 |

|                                     |             |             |             |
|-------------------------------------|-------------|-------------|-------------|
| H                                   | -1.10906800 | 2.90948700  | -0.26487000 |
| Cartesian coordinates for <b>10</b> |             |             |             |
| C                                   | -1.30111400 | -0.61746200 | -0.05479300 |
| C                                   | 0.19094700  | 1.46406400  | 0.00293800  |
| C                                   | 1.18184200  | -0.81114900 | -0.05735600 |
| N                                   | 1.30628500  | 0.61554900  | -0.37913800 |
| N                                   | -0.11848000 | -1.40378200 | -0.36448800 |
| N                                   | -1.09985000 | 0.82455000  | -0.34049500 |
| H                                   | -0.14065600 | -1.66866400 | -1.34131200 |
| H                                   | -1.86206700 | 1.35153600  | 0.07932800  |
| H                                   | 1.43423000  | 0.68880100  | -1.38190900 |
| N                                   | 0.26234900  | 1.77507900  | 1.40276200  |
| H                                   | -0.31613100 | 2.61717700  | 1.51425000  |
| N                                   | 1.46226600  | -0.98737800 | 1.32302900  |
| H                                   | 1.55681100  | -1.95923900 | 1.58074700  |
| H                                   | 2.19985300  | -0.39037600 | 1.66661000  |
| N                                   | -1.70436700 | -0.85295400 | 1.30456600  |
| H                                   | -2.69649000 | -0.66107800 | 1.40160200  |
| H                                   | -1.53827000 | -1.82598000 | 1.53140300  |
| O                                   | 0.25734600  | 2.66534600  | -0.74347500 |
| H                                   | -0.23341300 | 2.49850900  | -1.55790400 |
| O                                   | -2.35130000 | -1.02482900 | -0.92765300 |
| H                                   | -2.24516800 | -0.51596500 | -1.74060200 |
| O                                   | 2.05660800  | -1.50073600 | -0.95710600 |
| H                                   | 2.95259500  | -1.26313500 | -0.69472300 |
| Cartesian coordinates for <b>11</b> |             |             |             |
| C                                   | -0.28410800 | 1.41049600  | -0.04990600 |
| C                                   | 1.36517200  | -0.45632000 | -0.03565100 |
| C                                   | -1.06124000 | -0.97365100 | -0.03890200 |
| N                                   | 0.29948000  | -1.41512100 | -0.30997900 |
| N                                   | -1.35114900 | 0.43996100  | -0.35450200 |
| N                                   | 1.06997600  | 0.95211000  | -0.34648500 |
| H                                   | -1.47488200 | 0.47538800  | -1.36120200 |
| H                                   | 1.21468400  | 1.07263600  | -1.34306500 |
| H                                   | 0.35983100  | -1.69823800 | -1.28119400 |
| N                                   | 1.73973700  | -0.54672700 | 1.33546600  |
| H                                   | 2.04260700  | -1.48021500 | 1.57826800  |
| H                                   | 2.39955000  | 0.16923800  | 1.60610800  |
| N                                   | -1.37966700 | -1.20456900 | 1.33053600  |
| H                                   | -2.30179000 | -0.86766800 | 1.57313500  |
| H                                   | -1.24017600 | -2.17385500 | 1.58272200  |
| N                                   | -0.37738000 | 1.79143000  | 1.32017300  |
| H                                   | 0.26864300  | 2.54055000  | 1.53214200  |
| H                                   | -1.32589400 | 2.01772500  | 1.58781300  |
| O                                   | 2.38505500  | -0.85602500 | -0.96495100 |
| H                                   | 3.19214100  | -0.40849800 | -0.69041100 |

|   |             |             |             |
|---|-------------|-------------|-------------|
| O | -0.45597600 | 2.48891400  | -0.98315700 |
| H | -1.29691900 | 2.90520100  | -0.76522300 |
| O | -1.83041200 | -1.74643600 | -0.97448700 |
| H | -2.75305300 | -1.64661600 | -0.71804100 |

Cartesian coordinates for **12**

|   |             |             |             |
|---|-------------|-------------|-------------|
| C | -0.13702400 | -1.42581000 | -0.03229000 |
| C | -1.16490700 | 0.83387200  | -0.02639600 |
| C | 1.32153400  | 0.61687500  | -0.18582500 |
| N | 0.12203700  | 1.42999400  | -0.36327700 |
| N | 1.15775500  | -0.82920700 | -0.38841300 |
| N | -1.30879900 | -0.60033500 | -0.31180300 |
| H | 1.31484400  | -0.99457700 | -1.37720000 |
| H | -1.50752400 | -0.68991700 | -1.30267100 |
| H | 0.10450600  | 1.76372600  | -1.32002800 |
| N | -1.41416700 | 1.04642200  | 1.36508700  |
| H | -1.44822000 | 2.03516300  | 1.57789500  |
| H | -2.23881300 | 0.55526600  | 1.68443000  |
| N | 1.86947500  | 0.85098400  | 1.15049100  |
| H | 2.72607400  | 0.32918200  | 1.29995800  |
| H | 1.95919600  | 1.84184600  | 1.34564600  |
| N | -0.10365800 | -1.75340800 | 1.35803200  |
| H | -0.93309100 | -2.26535900 | 1.63077700  |
| H | 0.74450000  | -2.24638800 | 1.60492000  |
| O | -2.06984800 | 1.50859500  | -0.90843100 |
| H | -2.95861900 | 1.26958200  | -0.62414000 |
| O | -0.32476700 | -2.54444700 | -0.90786200 |
| H | 0.36116200  | -3.18385500 | -0.68684200 |
| O | 2.33209900  | 1.08892200  | -0.93826900 |

Cartesian coordinates for **13**

|   |             |             |             |
|---|-------------|-------------|-------------|
| C | 1.25674700  | -0.43371100 | -0.06068100 |
| C | -1.21788300 | -0.54864500 | -0.05622600 |
| C | -0.11610100 | 1.67808000  | 0.09973700  |
| N | -1.23183300 | 0.89676200  | -0.08642200 |
| N | 1.06877400  | 0.97268500  | 0.23322600  |
| N | 0.04518100  | -1.06346200 | -0.58384000 |
| H | 1.88890200  | 1.55603500  | 0.16065700  |
| H | 0.02804600  | -0.87529800 | -1.58133300 |
| H | -2.10784100 | 1.38039000  | -0.20155100 |
| N | -1.40114500 | -1.03896700 | 1.27795000  |
| H | -2.30748700 | -0.78642200 | 1.65141500  |
| H | -1.22194100 | -2.03161400 | 1.35621600  |
| N | 1.66954300  | -1.14141100 | 1.12124200  |
| H | 1.81235500  | -2.12707100 | 0.93271400  |
| H | 2.49594600  | -0.72726200 | 1.53617500  |
| O | -2.24959800 | -0.91216300 | -0.96923400 |
| H | -2.42304800 | -1.84970100 | -0.83114400 |

O 2.23381900 -0.45090400 -1.10962700  
H 2.61815900 -1.33394700 -1.12857300  
O -0.15588500 2.89323000 0.13803100

Cartesian coordinates for **14**

C 1.16577400 -0.61486600 -0.03830400  
C -1.29374100 -0.35011400 -0.17284300  
C 0.21317800 1.67182300 0.08238200  
N -1.01150600 1.02784000 0.20199000  
N 1.28103100 0.82485500 -0.08648500  
N -0.09854500 -1.06736100 -0.60495300  
H 2.18907100 1.24634300 -0.19792900  
H -0.04139900 -0.97691400 -1.61447100  
H -1.79515600 1.65971600 0.11688900  
N -1.89476600 -1.07421800 0.96050900  
H -2.71892000 -0.60704600 1.32526900  
H -2.08311300 -2.04122900 0.71537900  
N 1.23078300 -1.08160800 1.32048300  
H 1.05480300 -2.07652300 1.39085600  
H 2.10785600 -0.82954500 1.75999300  
O -2.29823900 -0.44224100 -1.05818700  
O 2.21934300 -1.06593500 -0.87879000  
H 2.30759000 -2.01447400 -0.73495900  
O 0.31877400 2.88218300 0.12082100

Cartesian coordinates for **15**

C 1.18143300 0.03045700 0.01432000  
C -1.00507200 1.22146500 0.01152900  
C -0.91715700 -1.26139600 0.06767200  
N -1.52425400 -0.04614100 -0.26216300  
N 0.40690100 -1.12128300 0.41954700  
N 0.36494000 1.22161100 0.16667000  
H 0.90458700 -1.97556700 0.61839700  
H 0.75542700 1.98149100 0.70143000  
H -2.52250900 -0.08707800 -0.40816100  
N 1.56879700 -0.07724700 -1.37202400  
H 1.94601000 0.78520900 -1.74565200  
H 2.17017700 -0.87081900 -1.56137000  
O -1.69707000 2.21018100 0.09980500  
O 2.26951900 0.10456200 0.91903300  
H 3.04511600 0.35995600 0.41038100  
O -1.51853900 -2.31161000 0.07611700

Cartesian coordinates for **16**

C 1.20461200 -0.00049000 0.12856400  
C -0.96027700 1.24518500 0.02483400  
C -0.96128500 -1.24464400 0.02448200  
N -1.53502600 0.00060100 -0.23650200  
N 0.38457700 -1.17130400 0.30673400



|   |             |             |             |
|---|-------------|-------------|-------------|
| N | 0.38524200  | 1.17040800  | 0.30883900  |
| H | 0.84910900  | -2.03457800 | 0.54245900  |
| H | 0.85048800  | 2.03368100  | 0.54323100  |
| H | -2.53217200 | 0.00099700  | -0.39458500 |
| N | 1.81538700  | 0.00041600  | -1.23560900 |
| H | 2.36540100  | 0.83711700  | -1.41043900 |
| H | 2.36458800  | -0.83651100 | -1.41190500 |
| O | -1.59339800 | 2.27588700  | 0.01222700  |
| O | 2.32060100  | -0.00149900 | 0.85779300  |
| O | -1.59557500 | -2.27461900 | 0.01244500  |

Cartesian coordinates for **17**

|   |             |             |             |
|---|-------------|-------------|-------------|
| C | -0.35830100 | 1.39224900  | -0.00005400 |
| C | -1.02657500 | -1.00642800 | -0.00004300 |
| C | 1.38488100  | -0.38581500 | -0.00005600 |
| N | 0.33374600  | -1.29683500 | -0.00063900 |
| N | 0.95619700  | 0.93745100  | 0.00048900  |
| N | -1.28993700 | 0.35938300  | 0.00001700  |
| H | 1.67761200  | 1.64472900  | 0.00019200  |
| H | -2.26316100 | 0.63052600  | 0.00003700  |
| H | 0.58555600  | -2.27524100 | -0.00001100 |
| O | -1.88678600 | -1.84972400 | 0.00031400  |
| O | -0.65855500 | 2.55882600  | -0.00020400 |
| O | 2.54533000  | -0.70910700 | 0.00009300  |

Cartesian coordinates for **ammonia**

|   |             |             |             |
|---|-------------|-------------|-------------|
| N | 0.00000000  | 0.00000000  | 0.11583300  |
| H | 0.00000000  | 0.93957100  | -0.27027600 |
| H | -0.81369200 | -0.46978600 | -0.27027600 |
| H | 0.81369200  | -0.46978600 | -0.27027600 |

Cartesian coordinates for **amino radical**

|   |            |             |             |
|---|------------|-------------|-------------|
| N | 0.00000000 | 0.00000000  | 0.14394600  |
| H | 0.00000000 | 0.80205900  | -0.50381200 |
| H | 0.00000000 | -0.80205900 | -0.50381200 |

Cartesian coordinates for **hydroxyl radical**

|   |            |            |             |
|---|------------|------------|-------------|
| O | 0.00000000 | 0.00000000 | 0.10835700  |
| H | 0.00000000 | 0.00000000 | -0.86685200 |

**Table S4. B3LYP/6-311G(d,p) cartesian coordinates of the optimized transition states for CA mechanism.**

Cartesian coordinates for **TS1-2**

|   |             |             |             |
|---|-------------|-------------|-------------|
| C | 0.36889400  | 0.37962900  | -0.00757500 |
| N | -0.08857600 | 1.46206100  | 0.01879300  |
| N | 1.20571700  | -0.66209700 | -0.08957200 |
| H | 0.77081900  | -1.55694100 | 0.08165800  |
| H | 2.11426500  | -0.52399300 | 0.32959200  |
| O | -1.36421900 | -0.71393100 | 0.05553100  |
| H | -2.00467900 | -0.08515000 | -0.31459600 |

Cartesian coordinates for **TS2-3**

|   |             |             |             |
|---|-------------|-------------|-------------|
| C | 0.75605700  | -0.08269400 | -0.07222700 |
| N | 1.79146700  | -0.63392000 | 0.44881700  |
| N | -0.27899200 | -0.81264000 | -0.58170500 |
| H | -0.18004700 | -1.77973400 | -0.28479600 |
| O | 0.53378700  | 1.25829200  | -0.24279700 |
| H | 1.27840900  | 1.74362900  | 0.12712900  |
| H | 2.53574100  | 0.03607400  | 0.63943300  |
| N | -2.41007600 | 0.07489000  | 0.22641500  |
| H | -2.63307700 | -0.55215000 | 1.00236300  |
| H | -2.09616600 | 0.94832400  | 0.65529800  |
| H | -1.42828700 | -0.36462400 | -0.41837800 |

Cartesian coordinates for **TS3-4**

|   |             |             |             |
|---|-------------|-------------|-------------|
| C | -0.66063700 | 0.06844200  | -0.09887700 |
| N | -0.42927200 | 1.32276800  | -0.18725700 |
| N | 0.27434000  | -0.87785700 | -0.44571900 |
| H | 1.50257600  | -0.49429300 | -0.37818000 |
| H | 0.09280000  | -1.75843000 | 0.03099200  |
| O | -1.83381200 | -0.52796600 | 0.29963400  |
| H | -2.49464000 | 0.15512200  | 0.45853200  |
| H | -1.23949800 | 1.88452700  | 0.06509000  |
| N | 2.44487200  | 0.04253900  | 0.15096200  |
| H | 2.10113800  | 0.98909800  | 0.33188700  |
| H | 2.64236700  | -0.37509000 | 1.06196900  |

Cartesian coordinates for **TS4-5**

|   |             |             |             |
|---|-------------|-------------|-------------|
| C | -1.31392900 | 0.00652000  | 0.15163300  |
| N | -0.97312200 | -0.53653800 | 1.35510600  |
| N | -1.35819200 | 1.37632900  | 0.06655700  |
| H | -1.51419700 | 1.67911500  | -0.88667200 |
| H | -0.50376400 | 1.79073700  | 0.43263700  |
| O | -2.25520800 | -0.54447500 | -0.67642000 |
| H | -2.22055100 | -1.50332800 | -0.60879000 |
| C | 1.46317300  | 0.03713400  | -0.19265500 |
| N | 0.30726600  | -0.56165000 | -0.62813600 |
| N | 1.55690300  | 1.30656100  | -0.03746300 |
| H | 2.46028800  | 1.58204000  | 0.34098400  |
| O | 2.46643600  | -0.87972500 | 0.01161000  |
| H | 3.28564700  | -0.41346200 | 0.21425600  |
| H | 0.41854000  | -1.57316900 | -0.58728600 |
| H | -1.24123700 | -1.52316800 | 1.36703200  |

Cartesian coordinates for **TS5-6**

|   |            |             |             |
|---|------------|-------------|-------------|
| C | 0.82155200 | -0.68733800 | -0.00224200 |
| N | 1.42541900 | 0.19669500  | -0.96772400 |
| N | 1.23891500 | -0.29939900 | 1.32832300  |
| H | 2.25487400 | -0.27757700 | 1.35683300  |
| H | 0.92774400 | -1.00865100 | 1.98452300  |
| O | 1.24225800 | -2.02469100 | -0.34256600 |

|   |             |             |             |
|---|-------------|-------------|-------------|
| H | 2.03879900  | -1.90301700 | -0.87254300 |
| H | 1.66640800  | 1.38697200  | -0.56655200 |
| C | -1.60472000 | 0.11521400  | -0.01263100 |
| N | -0.63220700 | -0.83974500 | -0.04049300 |
| N | -1.41367400 | 1.37535400  | -0.08192900 |
| H | -2.28392400 | 1.89185600  | 0.01450700  |
| O | -2.81921300 | -0.52180400 | 0.07875000  |
| H | -3.51572900 | 0.12968800  | -0.05242000 |
| H | -0.94248500 | -1.78743200 | -0.18155200 |
| H | 0.77385100  | 0.32705200  | -1.74013000 |
| N | 1.45067400  | 2.45700600  | -0.02552100 |
| H | 0.45166400  | 2.61200900  | -0.19884700 |
| H | 1.45955800  | 2.20442700  | 0.96736300  |

Cartesian coordinates for **TS6-7**

|   |             |             |             |
|---|-------------|-------------|-------------|
| C | 1.88535900  | -0.47562100 | 0.01722900  |
| C | -2.40575300 | -0.53066200 | -0.20481900 |
| C | -0.00865300 | 1.07924700  | -0.02971000 |
| N | -1.84979100 | 0.67220200  | -0.55486700 |
| N | 0.67284400  | 0.00578200  | -0.66761300 |
| N | 2.45966400  | -1.45517500 | -0.87336800 |
| H | 0.04349100  | -0.77973900 | -0.84180100 |
| H | 3.31958500  | -1.81091500 | -0.46910900 |
| H | -2.39430900 | 1.44130600  | -0.16713000 |
| N | -1.82020400 | -1.62744400 | -0.52509300 |
| H | -2.30078400 | -2.45268300 | -0.17353600 |
| N | -0.30062000 | 1.06373200  | 1.27262300  |
| H | -0.53180500 | 2.01730500  | 1.56078900  |
| N | 1.73397600  | -1.11358700 | 1.31324500  |
| H | 1.09695700  | -0.55131500 | 1.87365400  |
| H | 1.31132300  | -2.02687600 | 1.18221200  |
| O | -3.59917800 | -0.40140000 | 0.45305600  |
| H | -3.99583800 | -1.27144300 | 0.57814100  |
| O | 2.66734700  | 0.69966500  | 0.21211100  |
| H | 3.23520200  | 0.50371100  | 0.96573500  |
| O | 0.16714600  | 2.27654600  | -0.62894500 |
| H | 0.56410100  | 2.08737900  | -1.48967100 |
| H | 2.67275000  | -1.01156900 | -1.75974900 |

Cartesian coordinates for **TS7-8**

|   |             |             |             |
|---|-------------|-------------|-------------|
| C | -0.30631900 | 1.70780600  | -0.04844800 |
| C | 1.97200400  | -0.87556800 | 0.24146900  |
| C | -0.49303700 | -0.80158700 | -0.44411900 |
| N | 0.94344400  | -1.12907100 | -0.63917800 |
| N | -0.92169300 | 0.55007300  | -0.69544200 |
| N | 1.07423900  | 1.89931000  | -0.49675800 |
| H | -1.06838200 | 0.70556000  | -1.68454600 |
| H | 1.48922200  | 2.64853100  | 0.04999700  |

|   |             |             |             |
|---|-------------|-------------|-------------|
| H | 1.22280700  | -0.96281500 | -1.59657400 |
| N | 1.83486400  | -0.70493500 | 1.49622700  |
| H | 2.72962500  | -0.59410400 | 1.96616300  |
| N | -0.89305800 | -1.19425300 | 0.87898800  |
| H | -2.13521600 | -1.18871700 | 1.00951300  |
| H | -0.51415400 | -2.11585600 | 1.09437300  |
| N | -0.27677300 | 1.67238600  | 1.38841900  |
| H | -1.20213700 | 1.41924000  | 1.71923300  |
| H | 0.35986200  | 0.93880200  | 1.70214100  |
| O | 3.14716200  | -0.91692200 | -0.46075500 |
| H | 3.86839700  | -0.70118200 | 0.13906400  |
| O | -1.16156400 | 2.76905500  | -0.46843100 |
| H | -0.95367100 | 3.50455900  | 0.11921100  |
| O | -1.14330500 | -1.51884200 | -1.50506500 |
| H | -0.81837900 | -2.42496500 | -1.45361200 |
| H | 1.06180200  | 2.19742200  | -1.46758200 |
| N | -3.32451100 | -1.46913900 | 0.76206000  |
| H | -3.45364300 | -1.15980600 | -0.20433600 |
| H | -3.41595100 | -2.48749700 | 0.72733500  |

Cartesian coordinates for **TS8-9**

|   |             |             |             |
|---|-------------|-------------|-------------|
| C | -1.39348400 | -0.49972200 | -0.03010300 |
| C | 1.73725400  | 1.36601200  | 0.05533900  |
| C | 1.11799900  | -1.14608800 | -0.04859400 |
| N | 1.80300200  | 0.10610600  | -0.47153500 |
| N | -0.25659700 | -1.35178700 | -0.40682200 |
| N | -1.34377000 | 0.76109900  | -0.78633900 |
| H | -0.33976800 | -1.61851100 | -1.37974100 |
| H | -0.80423500 | 1.42362600  | -0.22311400 |
| H | 2.08794900  | 0.07917300  | -1.43926900 |
| N | 1.02437300  | 1.71187500  | 1.05718600  |
| H | 1.21076400  | 2.66820000  | 1.34780400  |
| N | 1.28134100  | -1.28800900 | 1.36515800  |
| H | 0.97432600  | -2.20999800 | 1.64858800  |
| H | 2.23157300  | -1.10767000 | 1.66421800  |
| N | -1.52099900 | -0.23585100 | 1.38707000  |
| H | -1.60471500 | -1.12376200 | 1.87230800  |
| H | -0.68273400 | 0.23342100  | 1.72707700  |
| O | 2.57086000  | 2.17639900  | -0.67380500 |
| H | 2.40416100  | 3.09144800  | -0.42367000 |
| O | -2.48945400 | -1.25547400 | -0.47413500 |
| H | -3.25015300 | -0.65273200 | -0.49561600 |
| O | 1.77627900  | -2.14737200 | -0.83696300 |
| H | 2.70860300  | -2.12128400 | -0.59444200 |
| H | -2.48145300 | 1.13504200  | -0.78155800 |
| N | -3.66899300 | 1.42029200  | -0.29512600 |
| H | -3.49492400 | 1.43118500  | 0.71362100  |

H -3.81999300 2.39614000 -0.56398000

Cartesian coordinates for **TS9-10**

C 1.47523800 -0.32796900 -0.03873600  
C -1.36236800 -0.98264600 0.06890400  
C -0.43320100 1.33433300 -0.05803000  
N -1.45739600 0.33073200 -0.41365000  
N 0.93520400 0.98038100 -0.39391200  
N 0.51813400 -1.41766700 -0.23300400  
H 1.10519300 1.16361500 -1.37385900  
H 0.72877400 -2.14483600 0.45275100  
H -1.57367500 0.32993600 -1.41848300  
N -1.41914400 -1.20818800 1.37364300  
H -1.52784800 -2.21654000 1.49747900  
N -0.53288200 1.61455900 1.32479500  
H 0.03722300 2.39786600 1.60718000  
H -1.47524000 1.62806100 1.68429900  
N 2.02299100 -0.28277700 1.28605200  
H 2.69197400 -1.03794600 1.40094600  
H 2.50884200 0.59789100 1.40890000  
O -1.90123400 -1.90850500 -0.80912400  
H -1.19492000 -2.10453900 -1.43954300  
O 2.52954500 -0.60255100 -0.98177400  
H 2.12144500 -1.07312300 -1.71975400  
O -0.68214000 2.43618400 -0.94120300  
H -1.53750500 2.79700000 -0.68341200

Cartesian coordinates for **TS10-11**

C 0.40656300 1.44780700 -0.02852000  
C -0.86472400 -0.73920400 0.06999700  
C 1.54443100 -0.72369600 -0.30276300  
N 0.26603200 -1.32420800 -0.61091600  
N 1.45352800 0.67332600 -0.71119100  
N -0.84599600 0.69127100 -0.13239200  
H 2.34292300 1.12619600 -0.52034000  
H -1.49951600 1.12913200 0.50807600  
H 0.31116100 -2.32625600 -0.46477600  
N -2.06354000 -1.38732900 -0.43397000  
H -2.00042000 -1.35390400 -1.45146600  
N 2.57043100 -1.44652200 -1.00213100  
H 2.64808800 -1.11347700 -1.95616400  
H 3.45379500 -1.34716100 -0.51705900  
N 0.15323400 2.72706100 -0.63819000  
H 0.89803600 3.37325500 -0.40421600  
H 0.09016100 2.61658500 -1.64304100  
O -0.84177200 -1.02339100 1.50261500  
H -1.41251000 -1.79179300 1.62834900  
O 0.77549700 1.77042800 1.30449800

|   |             |             |             |
|---|-------------|-------------|-------------|
| H | 1.22467400  | 0.98943000  | 1.65932300  |
| O | 1.88379000  | -0.82818700 | 1.10725600  |
| H | 1.09731800  | -1.17183400 | 1.56161600  |
| H | -3.07793500 | -0.71680300 | -0.12139400 |
| N | -3.96848600 | 0.14803500  | -0.24118100 |
| H | -3.51702900 | 0.96969400  | -0.65199500 |
| H | -4.57290700 | -0.21475800 | -0.98435400 |

Cartesian coordinates for **TS11-12**

|   |             |             |             |
|---|-------------|-------------|-------------|
| C | 1.60077200  | 0.70653400  | -0.16506400 |
| C | 0.34957300  | -1.43694500 | -0.00768200 |
| C | -0.88934600 | 0.73846200  | 0.12867600  |
| N | -0.91383500 | -0.71229600 | -0.16975400 |
| N | 0.32966700  | 1.43440000  | -0.32550400 |
| N | 1.54840000  | -0.72360100 | -0.46702600 |
| H | 0.21438800  | 1.61023500  | -1.31799500 |
| H | 1.58235800  | -0.81735200 | -1.47673200 |
| H | -1.17357700 | -0.79614700 | -1.14747800 |
| N | 0.51852900  | -1.80469900 | 1.35654200  |
| H | -0.19892100 | -2.44973900 | 1.65916400  |
| H | 1.45260000  | -2.13625100 | 1.55185200  |
| N | -1.02787900 | 0.93016700  | 1.54241600  |
| H | -1.19489100 | 1.91127000  | 1.73252400  |
| H | -1.78037400 | 0.36563900  | 1.91499500  |
| N | 2.08339100  | 0.89884900  | 1.16130400  |
| H | 3.04415900  | 0.59531900  | 1.25006100  |
| H | 1.93918200  | 1.84403000  | 1.48757100  |
| O | 0.17917300  | -2.54415500 | -0.90776300 |
| H | 0.93939300  | -3.12027300 | -0.77094700 |
| O | 2.46814600  | 1.20684800  | -1.19271100 |
| H | 2.62104500  | 2.13542200  | -0.98553600 |
| O | -1.89298200 | 1.33029200  | -0.66537000 |
| H | -3.00721400 | 0.91470400  | -0.28890700 |
| N | -3.85739500 | 0.09299900  | -0.25267100 |
| H | -4.16651700 | -0.08012800 | -1.21051400 |
| H | -3.43846400 | -0.77964900 | 0.07595300  |

Cartesian coordinates for **TS12-13**

|   |             |             |             |
|---|-------------|-------------|-------------|
| C | -0.74481400 | -1.23899100 | -0.02247600 |
| C | -0.74480100 | 1.23899700  | -0.02248400 |
| C | 1.42117200  | -0.00001400 | -0.33479000 |
| N | 0.68323700  | 1.20186500  | -0.27958300 |
| N | 0.68324100  | -1.20191800 | -0.27956100 |
| N | -1.44955300 | 0.00000800  | -0.36610900 |
| H | 0.98290000  | -1.84727200 | -0.99519600 |
| H | -1.54468900 | 0.00000700  | -1.37670100 |
| H | 0.98300800  | 1.84736500  | -0.99503600 |
| N | -0.98082000 | 1.53212900  | 1.35517800  |

|   |             |             |             |
|---|-------------|-------------|-------------|
| H | -0.51159900 | 2.37910900  | 1.64666800  |
| H | -1.96239100 | 1.52157400  | 1.59955300  |
| N | 2.39090900  | -0.00001500 | 1.22538900  |
| H | 3.00171700  | -0.82095200 | 1.20116900  |
| H | 3.00158500  | 0.82102400  | 1.20126600  |
| N | -0.98083300 | -1.53210100 | 1.35518200  |
| H | -1.96239300 | -1.52151600 | 1.59958800  |
| H | -0.51158000 | -2.37904500 | 1.64671800  |
| O | -1.20813500 | 2.24363600  | -0.93545100 |
| H | -2.06405100 | 2.54049800  | -0.61030800 |
| O | -1.20818600 | -2.24361800 | -0.93544400 |
| H | -2.06404900 | -2.54054100 | -0.61022000 |
| O | 2.49618800  | -0.00001600 | -1.01691400 |

Cartesian coordinates for **TS13-14**

|   |             |             |             |
|---|-------------|-------------|-------------|
| C | -0.97319400 | 1.13384600  | -0.04271700 |
| C | 0.86417500  | -0.48643900 | 0.26297500  |
| C | -1.50463000 | -1.26213600 | -0.22912500 |
| N | -0.22303400 | -1.45719100 | 0.27522900  |
| N | -1.80562300 | 0.04503200  | -0.53592200 |
| N | 0.42767500  | 0.79828300  | -0.29631400 |
| H | -2.78048400 | 0.23026000  | -0.71943600 |
| H | 0.50160900  | 0.70907500  | -1.30580900 |
| H | 0.04579400  | -2.42987100 | 0.31791300  |
| N | 1.33134200  | -0.26301800 | 1.61922900  |
| H | 1.41682900  | -1.14914100 | 2.10589400  |
| H | 2.24666500  | 0.17731200  | 1.59953900  |
| N | -1.16541900 | 1.37085300  | 1.35730900  |
| H | -0.33709800 | 1.70760800  | 1.82697300  |
| H | -1.99424200 | 1.91618700  | 1.55033400  |
| O | 1.81395600  | -1.04061700 | -0.60553000 |
| H | 2.85841500  | -0.46614500 | -0.45048500 |
| O | -1.33381100 | 2.22516500  | -0.87174200 |
| H | -0.89139600 | 2.99832500  | -0.50346500 |
| O | -2.27849900 | -2.18755400 | -0.38096200 |
| N | 3.68742400  | 0.41809300  | -0.61155400 |
| H | 4.04027700  | 0.31960200  | -1.56633300 |
| H | 3.19579500  | 1.31485800  | -0.59189500 |

Cartesian coordinates for **TS14-15**

|   |             |             |             |
|---|-------------|-------------|-------------|
| C | 1.09809500  | -0.73570000 | -0.03138500 |
| C | -1.27824700 | -0.12956500 | -0.37091900 |
| C | 0.45310700  | 1.63319600  | 0.04645700  |
| N | -0.85199500 | 1.14794600  | 0.05763000  |
| N | 1.40091800  | 0.66884400  | -0.21015300 |
| N | -0.21408100 | -1.04877400 | -0.58099100 |
| H | 2.36146900  | 0.96557100  | -0.12731500 |
| H | -0.14846000 | -1.27406600 | -1.56612200 |

|   |             |             |             |
|---|-------------|-------------|-------------|
| H | -1.56130800 | 1.86536600  | 0.08585500  |
| N | -2.16941000 | -0.84921000 | 1.10270100  |
| H | -3.00277600 | -0.27967600 | 1.27818300  |
| H | -2.51391200 | -1.76034300 | 0.78743100  |
| N | 1.08373500  | -1.08597300 | 1.36207600  |
| H | 0.66891300  | -1.99288300 | 1.53234000  |
| H | 1.99189600  | -0.98947300 | 1.79926000  |
| O | -2.32583600 | -0.23509200 | -1.06546200 |
| O | 2.08162300  | -1.40555400 | -0.80378200 |
| H | 2.11891700  | -2.31283900 | -0.48241800 |
| O | 0.70713300  | 2.80826100  | 0.20787200  |

Cartesian coordinates for **TS14-15**

|   |             |             |             |
|---|-------------|-------------|-------------|
| C | -0.61915800 | -0.63033200 | 0.36841200  |
| C | 0.70095800  | 1.48435800  | 0.24679500  |
| C | 1.78246500  | -0.69847000 | -0.27417800 |
| N | 1.71428600  | 0.69117000  | -0.28846600 |
| N | 0.66124300  | -1.29927200 | 0.27116400  |
| N | -0.33697100 | 0.74925400  | 0.78117100  |
| H | 0.60657500  | -2.30069800 | 0.14626800  |
| H | -1.13547400 | 1.30635100  | 1.04932000  |
| H | 2.52401100  | 1.17635800  | -0.64568800 |
| N | -1.43910100 | -1.33190700 | 1.32132400  |
| H | -1.17503900 | -1.10627800 | 2.27372400  |
| H | -2.42120900 | -1.12844600 | 1.17322500  |
| O | 0.76004700  | 2.69446600  | 0.26401900  |
| O | -1.18195600 | -0.70729100 | -0.90401300 |
| H | -2.28117300 | -0.22958900 | -0.83801400 |
| O | 2.74725400  | -1.31301100 | -0.66892500 |
| N | -3.31838400 | 0.41430700  | -0.91572100 |
| H | -3.06433700 | 1.36552100  | -1.19438700 |
| H | -3.80922000 | 0.02527800  | -1.72557500 |

Cartesian coordinates for **TS16-17**

|   |             |             |             |
|---|-------------|-------------|-------------|
| C | 1.16523200  | 0.00003200  | 0.31584400  |
| C | -0.95763700 | 1.24546300  | 0.03761100  |
| C | -0.95762100 | -1.24545900 | 0.03767700  |
| N | -1.53192300 | -0.00004300 | -0.20635800 |
| N | 0.36886800  | -1.16263400 | 0.41957700  |
| N | 0.36890000  | 1.16274400  | 0.41911600  |
| H | 0.85162000  | -2.03681700 | 0.56342900  |
| H | 0.85160000  | 2.03684400  | 0.56362900  |
| H | -2.51171500 | -0.00005100 | -0.45031100 |
| N | 1.77882400  | -0.00022600 | -1.38919500 |
| H | 2.38069400  | 0.81856700  | -1.51028600 |
| H | 2.38205000  | -0.81812000 | -1.50962600 |
| O | -1.56630000 | 2.28407800  | -0.06173400 |
| O | 2.33915700  | 0.00013400  | 0.78534700  |



O            -1.56620300   -2.28415100   -0.06181500

**Table S5. B3LYP/6-311G(d,p) cartesian coordinates for the optimized structures of MM mechanism.**

Cartesian coordinates for **18**

C            0.00010100   0.17324500   0.00009200  
N            -1.16736400   -0.60000700   0.07537000  
H            -1.19940700   -1.32813700   -0.62900100  
N            0.00063800   1.44143900   0.00010000  
N            1.16662800   -0.60088900   -0.07539800  
H            2.00503300   -0.03467300   -0.07116700  
H            1.19973200   -1.32729000   0.63082500  
H            -2.00528300   -0.03316600   0.06829000

Cartesian coordinates for **19**

C            0.01743800   0.12423000   0.00056900  
N            -1.27078900   -0.40519100   0.08508900  
H            -1.44050700   -1.18681900   -0.53404700  
N            0.19335500   1.38890200   -0.01111800  
H            1.18129600   1.62780300   0.04756700  
N            0.99057200   -0.87788800   -0.07844600  
H            1.93735800   -0.55071100   0.04487800  
H            0.79261100   -1.69693700   0.48084300  
H            -1.96735200   0.32051600   -0.01132700

Cartesian coordinates for **20**

C            0.11181300   0.00021200   0.00428300  
N            0.81627400   1.13252100   0.01127000  
H            0.18323100   1.93576500   -0.05237300  
N            0.82221300   -1.12825400   0.01125900  
H            0.19345100   -1.93490800   -0.05192200  
N            -1.28657700   -0.00325800   -0.07656300  
H            -1.75338900   -0.84461800   0.22791600  
H            -1.75754100   0.83542300   0.22891800

Cartesian coordinates for **21**

C            1.42452800   0.03196200   0.00134600  
N            0.26093800   -0.70831700   0.04514900  
H            0.28890800   -1.63064300   -0.36504400  
N            1.40018100   1.31666900   0.01635800  
H            2.33800300   1.70578000   0.06490800  
N            2.56339500   -0.77548600   -0.09073800  
H            3.43299700   -0.28697300   0.06358300  
H            2.51538600   -1.64350700   0.42564900  
C            -1.09090300   -0.10943200   -0.00987100  
N            -1.95794300   -1.24446000   -0.28829800  
H            -2.89109100   -0.82368500   -0.35176000  
N            -1.29182700   0.93223400   -1.00308400  
H            -1.25918200   0.52119800   -1.93237400  
N            -1.46767600   0.39893200   1.29664500

|   |             |            |             |
|---|-------------|------------|-------------|
| H | -0.75336600 | 0.22932600 | 1.98948200  |
| H | -1.71803800 | 1.37712500 | 1.24805000  |
| H | -0.50484500 | 1.57919600 | -0.92356700 |

Cartesian coordinates for **22**

|   |             |             |             |
|---|-------------|-------------|-------------|
| C | 1.20291200  | 0.04126100  | -0.03469900 |
| N | 0.00569400  | -0.64542800 | 0.05695800  |
| H | 0.02232400  | -1.63870100 | -0.12068300 |
| N | 1.25152200  | 1.31387100  | -0.19150200 |
| H | 2.20453500  | 1.66263300  | -0.16603200 |
| N | 2.29592300  | -0.82553400 | 0.01403200  |
| H | 3.18882600  | -0.36675300 | 0.11363400  |
| H | 2.19793600  | -1.61648200 | 0.63583200  |
| C | -1.31694400 | -0.15457200 | 0.01782700  |
| N | -2.22243000 | -1.04451700 | -0.15473400 |
| H | -3.15088400 | -0.62910000 | -0.13793200 |
| N | -1.44940700 | 1.19175300  | 0.23801900  |
| H | -0.61198200 | 1.74725000  | 0.06357000  |
| H | -2.33567900 | 1.59000500  | -0.02656300 |

Cartesian coordinates for **23**

|   |             |             |             |
|---|-------------|-------------|-------------|
| C | 1.16796800  | 0.06054500  | -0.08873200 |
| N | 0.00524500  | -0.69155400 | 0.12669900  |
| H | 0.03173200  | -1.65466000 | -0.17915000 |
| N | 1.09704700  | 1.25676200  | -0.52025400 |
| H | 2.00258300  | 1.72029100  | -0.51396800 |
| N | 2.30756300  | -0.69981000 | 0.16355900  |
| H | 3.17831500  | -0.19196700 | 0.12243500  |
| H | 2.24504200  | -1.31921000 | 0.95996800  |
| C | -1.26692500 | -0.12104300 | 0.04795300  |
| N | -2.22614200 | -0.87389100 | -0.40943600 |
| H | -3.10884100 | -0.36297200 | -0.41438000 |
| N | -1.40856100 | 1.09114800  | 0.64872600  |
| H | -2.18116100 | 1.59292400  | 0.20471200  |

Cartesian coordinates for **24**

|   |             |             |             |
|---|-------------|-------------|-------------|
| C | 1.74285000  | -0.46407900 | -0.06710000 |
| N | 0.99659400  | 0.56851300  | 0.51030300  |
| H | 1.53892500  | 1.21316700  | 1.06829700  |
| N | 1.19464000  | -1.51171300 | -0.55415200 |
| H | 1.87280500  | -2.11979000 | -1.00451200 |
| N | 3.10726600  | -0.23477400 | 0.06946300  |
| H | 3.71181200  | -0.94398700 | -0.31651200 |
| H | 3.43046600  | 0.70778700  | -0.09784800 |
| C | -0.13218300 | 1.23465200  | 0.00527600  |
| N | -0.13134300 | 2.50570300  | 0.12847100  |
| H | -1.03480400 | 2.90209400  | -0.12137400 |
| N | -1.12401700 | 0.47314000  | -0.63597300 |
| H | -1.70268400 | 1.05897300  | -1.22484900 |

|   |             |             |             |
|---|-------------|-------------|-------------|
| C | -1.95361100 | -0.50490600 | -0.00389700 |
| N | -3.21047700 | -0.41738800 | -0.18567600 |
| N | -1.31534200 | -1.45005400 | 0.75886300  |
| H | -1.93859700 | -2.16012000 | 1.11570000  |
| H | -0.44150000 | -1.78610800 | 0.33633800  |

Cartesian coordinates for **25**

|   |             |             |             |
|---|-------------|-------------|-------------|
| C | 1.78886500  | -0.49936900 | -0.06372200 |
| N | 1.06269300  | 0.53910400  | 0.52508800  |
| H | 1.62563000  | 1.18350600  | 1.06286700  |
| N | 1.21796200  | -1.54489000 | -0.52926000 |
| H | 1.87563100  | -2.16496100 | -0.99312900 |
| N | 3.15858000  | -0.28333100 | 0.03758600  |
| H | 3.74624200  | -0.99850000 | -0.36323300 |
| H | 3.48473100  | 0.65616500  | -0.14087500 |
| C | -0.05040100 | 1.23673500  | 0.01498800  |
| N | 0.00772500  | 2.50917600  | 0.12535200  |
| H | -0.87956700 | 2.94013900  | -0.12538200 |
| N | -1.07989500 | 0.52075700  | -0.60391500 |
| H | -1.67648400 | 1.13857700  | -1.14019900 |
| C | -1.93927200 | -0.44825500 | -0.00563100 |
| N | -3.18668100 | -0.27893900 | -0.23965400 |
| N | -1.31123600 | -1.40273600 | 0.74955800  |
| H | -1.91627700 | -2.14535200 | 1.06585600  |
| H | -0.40303200 | -1.70518200 | 0.37855900  |
| H | -3.73606400 | -1.05305600 | 0.12844300  |

Cartesian coordinates for **26**

|   |             |             |             |
|---|-------------|-------------|-------------|
| C | 1.57846400  | -0.57382000 | -0.15836300 |
| N | 1.11431900  | 0.64620100  | 0.31904900  |
| H | 1.79048000  | 1.24126600  | 0.77269100  |
| N | 0.81177100  | -1.43073600 | -0.71540800 |
| H | 1.33485300  | -2.24561100 | -1.02570600 |
| N | 2.93775700  | -0.73756700 | 0.12708300  |
| H | 3.35175000  | -1.55725600 | -0.29069800 |
| H | 3.51866800  | 0.08240200  | 0.01453700  |
| C | -0.02358400 | 1.38388600  | -0.01785700 |
| N | 0.10223200  | 2.65714600  | 0.01192900  |
| H | -0.79943800 | 3.11492600  | -0.10079500 |
| N | -1.18094200 | 0.70653300  | -0.38294900 |
| H | -1.81759400 | 1.22182600  | -0.97178800 |
| C | -1.72981300 | -0.47691800 | 0.11069300  |
| N | -2.87680200 | -0.81905700 | -0.43049300 |
| N | -1.14814400 | -1.04066800 | 1.18567400  |
| H | -1.47723500 | -2.00452300 | 1.25932600  |
| H | -3.17321000 | -1.72488500 | -0.06858200 |

Cartesian coordinates for **27**

|   |            |            |            |
|---|------------|------------|------------|
| C | 1.23891000 | 0.04155200 | 0.05513300 |
|---|------------|------------|------------|

|   |             |             |             |
|---|-------------|-------------|-------------|
| N | 0.40796700  | 1.20020400  | -0.26137800 |
| H | 0.90772700  | 2.07605000  | -0.23981000 |
| N | 1.56482800  | -0.10341400 | 1.45340300  |
| H | 0.68128000  | -0.02639200 | 1.96844800  |
| N | 2.47630300  | 0.19953000  | -0.65260400 |
| H | 3.21001300  | -0.33981800 | -0.21117000 |
| H | 2.38113600  | -0.03313900 | -1.63386000 |
| C | -0.95872100 | 1.22912800  | -0.06284700 |
| N | -1.73819900 | 2.23949100  | -0.02845600 |
| H | -1.22520600 | 3.11296200  | -0.11879600 |
| N | -1.52009600 | -0.04037500 | 0.10008800  |
| H | -2.52418000 | -0.02882600 | 0.19599600  |
| C | -0.88813600 | -1.26105200 | -0.11193100 |
| N | -1.42323500 | -2.41928300 | -0.09155600 |
| N | 0.47329600  | -1.13742800 | -0.37491600 |
| H | -2.43060700 | -2.36971200 | 0.04165800  |
| H | 0.96147100  | -2.01996000 | -0.29666300 |

Cartesian coordinates for **28**

|   |             |             |             |
|---|-------------|-------------|-------------|
| C | 0.55484000  | -1.32241100 | 0.00038300  |
| N | 1.32903100  | -0.17314600 | -0.00058200 |
| H | 2.33355000  | -0.25987700 | -0.00133800 |
| N | 0.94857300  | -2.53280900 | -0.00115000 |
| H | 1.96231100  | -2.60556600 | -0.00242700 |
| C | 0.86778700  | 1.14171700  | 0.00016700  |
| N | 1.71958400  | 2.08752600  | -0.00068900 |
| H | 1.27670600  | 3.00241000  | -0.00004300 |
| N | -0.51468400 | 1.23768900  | 0.00218200  |
| H | -0.94179100 | 2.15100100  | -0.00178400 |
| C | -1.42284500 | 0.18071300  | 0.00034600  |
| N | -2.66790400 | 0.44505200  | -0.00240600 |
| N | -0.81452000 | -1.06441500 | 0.00286200  |
| H | -3.23827100 | -0.39626300 | -0.00316400 |
| H | -1.39175400 | -1.89109400 | 0.00187100  |

**Table S6. B3LYP/6-311G(d,p) cartesian coordinates of the optimized transition states for MM mechanism.**

Cartesian coordinates for **TS1-18**

|   |             |             |             |
|---|-------------|-------------|-------------|
| C | -0.38607600 | 0.33039200  | -0.00368600 |
| N | -0.10162800 | 1.47459500  | 0.00364300  |
| N | -1.16241000 | -0.76703800 | -0.07104800 |
| H | -0.69280100 | -1.62012300 | 0.19186000  |
| H | -2.11207700 | -0.65087500 | 0.25257300  |
| N | 1.45395000  | -0.61857300 | 0.01993300  |
| H | 1.86466400  | -0.25132600 | -0.84496700 |
| H | 1.92728600  | -0.08291400 | 0.75496000  |

Cartesian coordinates for **TS18-19**

|   |             |             |            |
|---|-------------|-------------|------------|
| C | -0.63891000 | -0.07773500 | 0.01303100 |
|---|-------------|-------------|------------|

|   |             |             |             |
|---|-------------|-------------|-------------|
| N | -0.37716800 | 1.29006800  | 0.09630000  |
| H | -0.97449400 | 1.86264800  | -0.48531500 |
| N | 0.19958000  | -1.03663200 | 0.06283100  |
| N | -2.00608900 | -0.34732900 | -0.12192300 |
| H | -2.19475000 | -1.33864200 | -0.05890100 |
| H | -2.58844500 | 0.19033300  | 0.50838100  |
| H | 0.60097600  | 1.51938600  | 0.00554500  |
| N | 2.54806200  | -0.17403900 | -0.03225100 |
| H | 2.57783900  | 0.47982200  | 0.75680200  |
| H | 1.33189100  | -0.78722300 | 0.03132900  |
| H | 2.52975000  | 0.41560700  | -0.87072500 |

Cartesian coordinates for **TS19-20**

|   |             |             |             |
|---|-------------|-------------|-------------|
| C | -0.63938200 | 0.09176300  | -0.05102400 |
| N | 0.23115600  | -0.97547900 | -0.27610000 |
| H | 0.08204300  | -1.71184100 | 0.41335700  |
| N | -0.23217200 | 1.30724900  | -0.10059000 |
| H | -1.00903400 | 1.96143600  | -0.02651800 |
| N | -1.94683300 | -0.32936300 | 0.22975800  |
| H | -2.64710000 | 0.39505300  | 0.15371700  |
| H | -2.22652500 | -1.17884700 | -0.24196000 |
| H | 1.48861600  | -0.62372900 | -0.33917900 |
| N | 2.43896000  | -0.01178800 | 0.04145300  |
| H | 2.06845500  | 0.94364600  | 0.07588900  |
| H | 2.64206500  | -0.27063600 | 1.00919700  |

Cartesian coordinates for **TS20-21**

|   |             |             |             |
|---|-------------|-------------|-------------|
| C | -1.45238300 | 0.03423900  | -0.16313400 |
| N | -0.35201200 | -0.71379900 | -0.50499000 |
| H | -0.45165100 | -1.67598800 | -0.18666900 |
| N | -1.37919300 | 1.32950500  | -0.16178000 |
| H | -2.27186900 | 1.74950700  | 0.08842100  |
| N | -2.60313000 | -0.68962700 | 0.18714100  |
| H | -3.46394400 | -0.16412100 | 0.11924600  |
| H | -2.68752500 | -1.59774500 | -0.24896200 |
| C | 1.32012600  | -0.04525700 | 0.11051800  |
| N | 1.69086100  | -1.26089700 | 0.66702300  |
| H | 2.10538500  | -1.82232100 | -0.08328700 |
| N | 1.12126400  | 0.96239100  | 1.03948600  |
| H | 0.92419100  | 0.56947700  | 1.95133400  |
| N | 1.93648100  | 0.39498400  | -1.07805300 |
| H | 1.59273100  | -0.12405600 | -1.87639500 |
| H | 1.77870600  | 1.38435200  | -1.22760900 |
| H | 0.36762600  | 1.58910800  | 0.73782700  |

Cartesian coordinates for **TS21-22**

|   |             |             |            |
|---|-------------|-------------|------------|
| C | -1.43423500 | 0.00364800  | 0.06350700 |
| N | -0.26054500 | -0.72104200 | 0.03505800 |
| H | -0.32347900 | -1.72252800 | 0.12866900 |

|   |             |             |             |
|---|-------------|-------------|-------------|
| N | -1.43583200 | 1.26159600  | 0.31588400  |
| H | -2.36817500 | 1.65676200  | 0.22887300  |
| N | -2.55200900 | -0.80491600 | -0.16325600 |
| H | -3.41354300 | -0.29384400 | -0.28616100 |
| H | -2.43026400 | -1.52110500 | -0.86670700 |
| C | 1.04958400  | -0.20822100 | 0.27480200  |
| N | 1.34564100  | 0.78875200  | 1.08486400  |
| H | 0.49104400  | 1.31711900  | 1.27323100  |
| N | 1.30210200  | 0.90165200  | -1.35376700 |
| H | 2.15227300  | 1.43291300  | -1.14161000 |
| N | 1.98531100  | -1.25119900 | 0.11984200  |
| H | 2.87940800  | -0.94830800 | 0.48631500  |
| H | 2.07845100  | -1.51097700 | -0.85565000 |
| H | 0.54951200  | 1.59350000  | -1.26718200 |

Cartesian coordinates for **TS22-23**

|   |             |             |             |
|---|-------------|-------------|-------------|
| C | 1.62887900  | 0.28390700  | -0.01309700 |
| N | 0.73257500  | -0.76727500 | -0.05647700 |
| H | 1.08706400  | -1.69057700 | -0.25495700 |
| N | 1.28210100  | 1.45427800  | 0.38326900  |
| H | 2.04847500  | 2.11742400  | 0.32403000  |
| N | 2.91405300  | -0.10831900 | -0.38798800 |
| H | 3.55193700  | 0.65557500  | -0.55271100 |
| H | 2.97310800  | -0.81953300 | -1.10364500 |
| C | -0.64617400 | -0.79182400 | 0.24979400  |
| N | -1.22709200 | -1.92316200 | 0.02939000  |
| H | -2.19837800 | -1.86694800 | 0.33047700  |
| N | -1.22999200 | 0.33199200  | 0.76792000  |
| H | -2.32460900 | 0.60294000  | 0.28869600  |
| N | -3.13041600 | 1.04551700  | -0.59559800 |
| H | -2.97833700 | 2.05185900  | -0.69719600 |
| H | -2.86666100 | 0.64061600  | -1.49662700 |
| H | -0.57742700 | 1.12492700  | 0.75814500  |

Cartesian coordinates for **TS23-24**

|   |             |             |             |
|---|-------------|-------------|-------------|
| C | 1.73831700  | -0.42626200 | 0.02106800  |
| N | 1.01624000  | 0.69849500  | 0.40152300  |
| H | 1.53658700  | 1.41007700  | 0.89313000  |
| N | 1.19761000  | -1.45339500 | -0.52557300 |
| H | 1.90171100  | -2.13216800 | -0.80247500 |
| N | 3.09556500  | -0.30507600 | 0.28646500  |
| H | 3.59537800  | -1.16357800 | 0.45414200  |
| H | 3.42334200  | 0.47672400  | 0.83145300  |
| C | -0.11998400 | 1.29707300  | -0.18827000 |
| N | -0.16369300 | 2.58463000  | -0.05446100 |
| H | -1.06255400 | 2.94379000  | -0.37083600 |
| N | -0.99904700 | 0.48646600  | -0.85555000 |
| H | -1.74896200 | 1.06350200  | -1.23173700 |

|   |             |             |             |
|---|-------------|-------------|-------------|
| C | -2.10741400 | -0.71299000 | 0.23693700  |
| N | -2.92202600 | 0.02997500  | 0.69234700  |
| N | -1.55886400 | -1.90606600 | -0.01960300 |
| H | -1.80492800 | -2.62543900 | 0.64665500  |
| H | -0.56659000 | -1.86503100 | -0.31478300 |

Cartesian coordinates for **TS24-25**

|   |             |             |             |
|---|-------------|-------------|-------------|
| C | 2.12851200  | 0.82939400  | 0.03367400  |
| N | 1.64054300  | -0.33092000 | -0.57484300 |
| H | 2.29705000  | -0.77820800 | -1.19958100 |
| N | 1.35495500  | 1.66740600  | 0.61273500  |
| H | 1.87298500  | 2.41077000  | 1.07225100  |
| N | 3.49334900  | 0.97821600  | -0.18001600 |
| H | 3.91496900  | 1.80109300  | 0.22310000  |
| H | 4.06162100  | 0.14722600  | -0.09483000 |
| C | 0.78260800  | -1.31196000 | -0.04347100 |
| N | 1.13544300  | -2.52207400 | -0.25029800 |
| H | 0.40370900  | -3.17286500 | 0.02689900  |
| N | -0.33576600 | -0.90248800 | 0.69879700  |
| H | -0.70489500 | -1.67694000 | 1.23684900  |
| C | -1.45999100 | -0.17756000 | 0.18325100  |
| N | -2.59546600 | -0.71975600 | 0.40807700  |
| N | -1.15586700 | 0.97136300  | -0.48843500 |
| H | -1.95883900 | 1.53097900  | -0.72769900 |
| H | -0.33185700 | 1.47106800  | -0.13208600 |
| H | -3.55373400 | -0.11988900 | 0.12732500  |
| N | -4.43940200 | 0.81393200  | -0.29406700 |
| H | -4.17686400 | 1.68163600  | 0.18469100  |
| H | -4.21543400 | 0.97612500  | -1.28129300 |

Cartesian coordinates for **TS25-26**

|   |             |             |             |
|---|-------------|-------------|-------------|
| C | 2.04360900  | 0.01087500  | 0.26865000  |
| N | 1.07793400  | 0.97662300  | -0.08468000 |
| H | 1.28818300  | 1.86367800  | 0.34951900  |
| N | 2.86526200  | 0.37038800  | 1.17970300  |
| H | 3.57703400  | -0.33963200 | 1.33516900  |
| N | 2.05422300  | -1.14984700 | -0.47225800 |
| H | 2.54154300  | -1.92558700 | -0.05400000 |
| H | 1.22135300  | -1.39237100 | -0.98960700 |
| C | -0.06133600 | 0.92757800  | -0.86580100 |
| N | -0.62921100 | 1.93450200  | -1.41895200 |
| H | -0.04917500 | 2.76935000  | -1.34454500 |
| N | -0.62446600 | -0.34485900 | -1.07377100 |
| H | -1.13622000 | -0.40433100 | -1.94284400 |
| C | -1.15931200 | -1.19312200 | -0.07313600 |
| N | -1.52896800 | -2.36278700 | -0.47233900 |
| N | -1.15110800 | -0.68592000 | 1.19775800  |
| H | -1.54859300 | 0.48545900  | 1.39273300  |

|   |             |             |            |
|---|-------------|-------------|------------|
| H | -2.00708000 | -2.86253400 | 0.27551900 |
| N | -2.30256000 | 1.48875100  | 1.32730000 |
| H | -2.26627200 | 1.82961200  | 0.36035600 |
| H | -3.27500400 | 1.23701100  | 1.51491900 |
| H | -1.61127900 | -1.32059400 | 1.84517900 |

Cartesian coordinates for **TS26–27**

|   |             |             |             |
|---|-------------|-------------|-------------|
| C | -1.43529200 | 0.04691400  | -0.04052000 |
| N | -0.59050900 | 1.09901600  | -0.44573800 |
| H | -0.91256800 | 1.65239100  | -1.22381200 |
| N | -2.24876900 | -0.40855300 | -1.00961400 |
| H | -3.00720600 | -0.93890500 | -0.57377800 |
| N | -1.82913100 | 0.11148800  | 1.30054800  |
| H | -2.08565700 | -0.79477400 | 1.67143600  |
| H | -1.13727300 | 0.54933700  | 1.89571100  |
| C | 0.72544100  | 1.30888400  | -0.06042100 |
| N | 1.25850400  | 2.44985700  | -0.25072000 |
| H | 2.25433600  | 2.43781800  | -0.04283800 |
| N | 1.33739800  | 0.17648300  | 0.50586400  |
| H | 2.31956500  | 0.30581900  | 0.71117500  |
| C | 1.10065700  | -1.12837000 | 0.01972200  |
| N | 2.12318600  | -1.88891200 | -0.14585200 |
| N | -0.22391700 | -1.48789400 | -0.05018900 |
| H | 1.85193000  | -2.82229200 | -0.45101100 |
| H | -0.41529600 | -2.11435400 | -0.82966800 |

Cartesian coordinates for **TS27–28**

|   |             |             |             |
|---|-------------|-------------|-------------|
| C | -1.15942000 | -0.06128000 | -0.34889900 |
| N | -0.43916600 | 1.12251900  | -0.54994500 |
| H | -0.95431200 | 1.99036400  | -0.54476300 |
| N | -2.43142000 | -0.23651200 | -0.70263300 |
| H | -2.89313700 | 0.66629300  | -0.80828400 |
| N | -1.57802400 | -0.01443300 | 1.54021000  |
| H | -2.18710100 | 0.79394300  | 1.70376200  |
| H | -2.17936100 | -0.82650600 | 1.70540600  |
| C | 0.87200700  | 1.27666400  | -0.09575700 |
| N | 1.33635300  | 2.45274400  | 0.05676000  |
| H | 2.31132900  | 2.44289900  | 0.34518300  |
| N | 1.52196100  | 0.07128200  | 0.11363100  |
| H | 2.48558000  | 0.08137300  | 0.40959100  |
| C | 0.99273900  | -1.20425500 | -0.06494500 |
| N | 1.75026800  | -2.21266500 | 0.11266100  |
| N | -0.33697900 | -1.19117700 | -0.45832500 |
| H | 1.25432500  | -3.08896000 | -0.02765900 |
| H | -0.83024200 | -2.06848600 | -0.51214000 |

**Table S7. B3LYP/6–311G(d,p) cartesian coordinates for the optimized structures of BA mechanism.**

Cartesian coordinates for **29**



|   |             |             |             |
|---|-------------|-------------|-------------|
| C | 0.00000000  | 0.00000000  | 0.14633200  |
| N | 0.00000000  | 1.16210500  | -0.61336800 |
| H | 0.20664700  | 1.98663400  | -0.07038200 |
| H | 0.44978200  | 1.13290600  | -1.51633700 |
| N | 0.00000000  | -1.16210500 | -0.61336800 |
| H | -0.20664700 | -1.98663400 | -0.07038200 |
| H | -0.44978200 | -1.13290600 | -1.51633700 |
| O | 0.00000000  | 0.00000000  | 1.36032500  |

Cartesian coordinates for **30**

|   |             |             |             |
|---|-------------|-------------|-------------|
| C | 0.05356900  | 0.07936500  | 0.01555300  |
| N | -1.26937400 | -0.23785200 | 0.05611900  |
| H | -1.93991600 | 0.50713500  | -0.04273200 |
| H | -1.55395000 | -1.18089700 | -0.15119300 |
| N | 0.90474700  | -1.02311100 | -0.06954200 |
| H | 1.77175500  | -0.75912000 | 0.40707500  |
| O | 0.49413600  | 1.22292900  | -0.02656200 |

Cartesian coordinates for **31**

|   |             |             |             |
|---|-------------|-------------|-------------|
| C | -1.27124200 | -0.03304600 | -0.13589700 |
| C | 0.00011600  | -0.00060900 | -0.96454200 |
| C | 1.27130400  | 0.03287600  | -0.13582600 |
| H | 0.04477600  | -0.88936200 | -1.59490400 |
| H | -0.04448400 | 0.88741600  | -1.59593300 |
| O | -2.21284700 | 0.69833400  | -0.27608800 |
| O | 2.21314900  | -0.69827900 | -0.27532700 |
| O | 1.22913600  | 1.02750600  | 0.77946100  |
| H | 2.06359700  | 0.99336700  | 1.27077700  |
| O | -1.22956200 | -1.02690300 | 0.78021000  |
| H | -2.06396500 | -0.99202500 | 1.27160000  |

Cartesian coordinates for **32**

|   |             |             |             |
|---|-------------|-------------|-------------|
| C | 2.39558800  | -0.01130100 | -0.30733800 |
| N | 2.10399300  | -1.34672500 | -0.48735900 |
| H | 2.88609000  | -1.87835300 | -0.83777600 |
| H | 1.52699400  | -1.78992700 | 0.21518700  |
| N | 1.43573800  | 0.71872000  | 0.39716400  |
| O | 3.39411700  | 0.52974600  | -0.73806700 |
| C | 0.05895300  | 0.37188300  | 0.65676100  |
| C | -0.76785200 | 0.25969000  | -0.73076400 |
| C | -2.24451100 | -0.01964400 | -0.59568800 |
| H | -0.64131900 | 1.17798300  | -1.29650500 |
| H | -0.27000100 | -0.56857400 | -1.24489600 |
| O | 0.04628200  | -0.85625300 | 1.34082900  |
| O | -3.11580100 | 0.55125500  | -1.18778400 |
| O | -2.50124400 | -1.04187900 | 0.27370900  |
| H | -3.46420600 | -1.14270500 | 0.32058000  |
| H | 1.62631300  | 1.70979300  | 0.41345000  |
| O | -0.60063500 | 1.37051000  | 1.25115700  |

H -0.87680700 -1.14297800 1.40474200

Cartesian coordinates for **33**

C -2.06620200 -0.32998500 0.02803400  
N -1.39086400 -1.50548100 0.23405000  
H -2.00247800 -2.30151900 0.33541100  
H -0.52491100 -1.66615300 -0.26490500  
N -1.26606100 0.80347400 -0.26171100  
O -3.27031500 -0.21581900 0.07679100  
C 0.03443800 1.20129200 0.02369600  
C 0.92742100 0.32056900 0.90253700  
C 1.97494600 -0.42085200 0.09835700  
H 1.45793300 0.99179800 1.57423700  
H 0.35155800 -0.40447100 1.47920600  
O 0.44000100 2.26804200 -0.38036800  
O 3.16051300 -0.36378700 0.24838500  
O 1.39442700 -1.21729100 -0.85049700  
H 2.11037200 -1.65487300 -1.33583500  
H -1.81462700 1.55396200 -0.66472100

Cartesian coordinates for **34**

C -1.86729100 -0.41300700 0.06733300  
N -1.22576000 -1.35138900 0.84799400  
H -1.48776700 -2.27423300 0.49320900  
N -1.25603000 0.81226100 -0.14409200  
O -3.01456200 -0.61795500 -0.31016100  
C 0.02896300 1.31402200 0.10613800  
C 1.04452300 0.45657100 0.84376500  
C 1.82537200 -0.49704900 -0.04319500  
H 1.76327800 1.13244000 1.30194500  
H 0.56303400 -0.14806200 1.61585300  
O 0.29665800 2.43183500 -0.26651700  
O 2.97854000 -0.78569800 0.11146600  
O 1.05849500 -1.02149700 -1.03261100  
H 1.62749600 -1.61894500 -1.54181400  
H -1.83596500 1.46599600 -0.65816900

Cartesian coordinates for **35**

C -0.77337100 -1.33076800 -0.10412500  
N 0.58764500 -1.09712500 -0.28909800  
H 1.15826200 -1.92890600 -0.19548600  
N -1.54293100 -0.17900500 0.00119300  
O -1.24327400 -2.44335400 -0.07529600  
C -1.11718500 1.14720100 -0.05366900  
C 0.34719300 1.34069900 -0.39080600  
C 1.24242500 0.18559400 0.04463800  
H 0.43656200 1.46015400 -1.47466600  
H 0.68907300 2.26180200 0.07930800  
O -1.89212000 2.05718600 0.11077600

|   |             |             |             |
|---|-------------|-------------|-------------|
| O | 1.36639700  | 0.02119500  | 1.38522900  |
| H | -2.52899800 | -0.33082100 | 0.17151500  |
| O | 2.46925200  | 0.29891300  | -0.61204300 |
| H | 3.13569800  | -0.05720100 | -0.01088900 |

Cartesian coordinates for **36**

|   |             |             |             |
|---|-------------|-------------|-------------|
| C | 0.00021900  | -1.42792300 | 0.00000400  |
| N | 1.17155700  | -0.67544400 | 0.00003100  |
| H | 2.02887600  | -1.21401800 | 0.00000600  |
| N | -1.17136800 | -0.67578500 | -0.00006300 |
| O | 0.00043300  | -2.63362800 | -0.00000600 |
| C | -1.30166300 | 0.70717800  | -0.00001200 |
| C | -0.00022200 | 1.48591000  | -0.00012600 |
| C | 1.30143700  | 0.70753100  | 0.00000300  |
| H | -0.00029600 | 2.14661700  | -0.87108300 |
| H | -0.00030200 | 2.14686400  | 0.87064600  |
| O | -2.38489300 | 1.23880100  | 0.00010700  |
| O | 2.38450100  | 1.23951900  | 0.00006900  |
| H | -2.02855000 | -1.21457800 | 0.00007900  |

**Table S8. B3LYP/6-311G(d,p) cartesian coordinates of the optimized transition states for BA mechanism.**

Cartesian coordinates for **TS29-30**

|   |             |             |             |
|---|-------------|-------------|-------------|
| N | -1.93367300 | -0.25793200 | 0.26111100  |
| H | -2.27120500 | -1.14815000 | -0.07319200 |
| C | -0.63521900 | 0.11155400  | -0.06219300 |
| N | 0.21798400  | -0.96270400 | -0.31993100 |
| H | 0.05446200  | -1.74557900 | 0.31129400  |
| O | -0.29474000 | 1.28039500  | -0.12869100 |
| H | -2.59694100 | 0.50031300  | 0.19477600  |
| H | 1.49106100  | -0.60567600 | -0.35441600 |
| N | 2.40722300  | -0.00238400 | 0.07941300  |
| H | 2.04348300  | 0.95229500  | 0.14578600  |
| H | 2.60763700  | -0.30454400 | 1.03428700  |

Cartesian coordinates for **TS30-32**

|   |             |             |             |
|---|-------------|-------------|-------------|
| C | 2.50603400  | -0.39185700 | -0.08590900 |
| N | 2.08498500  | -1.24909600 | 0.88086500  |
| H | 2.79210000  | -1.86058700 | 1.25776900  |
| H | 1.34781800  | -0.92377500 | 1.49431300  |
| N | 1.53987800  | 0.50305300  | -0.58905100 |
| O | 3.59768800  | -0.40999300 | -0.62994100 |
| C | -0.14072500 | 0.77237900  | 0.06450700  |
| C | -0.91150700 | -0.39117300 | -0.53918500 |
| C | -2.34563300 | -0.42735500 | -0.04852900 |
| H | -0.90944700 | -0.30918100 | -1.62699400 |
| H | -0.42635000 | -1.33358300 | -0.28082000 |
| O | 0.20241600  | 0.79779000  | 1.28259500  |
| O | -2.84945600 | 0.31034800  | 0.75439500  |

|   |             |             |             |
|---|-------------|-------------|-------------|
| O | -3.01606800 | -1.44012400 | -0.64667800 |
| H | -3.91939900 | -1.41967100 | -0.29642100 |
| H | 1.95843900  | 1.40911800  | -0.79536200 |
| O | -0.49927000 | 1.94752800  | -0.54198500 |
| H | -0.34869400 | 2.64363000  | 0.11242200  |

Cartesian coordinates for **TS32-33**

|   |             |             |             |
|---|-------------|-------------|-------------|
| C | -2.40364300 | -0.32508900 | -0.02558600 |
| N | -2.00153100 | -0.53393800 | -1.32665300 |
| H | -2.75835100 | -0.81293300 | -1.93340400 |
| H | -1.35771600 | 0.14802900  | -1.70939800 |
| N | -1.40716800 | 0.21676600  | 0.81255400  |
| O | -3.50540100 | -0.57775400 | 0.40466300  |
| C | -0.04134100 | 0.39297200  | 0.59564100  |
| C | 0.72483900  | -0.83652200 | 0.09305100  |
| C | 2.21555300  | -0.61378700 | -0.03918200 |
| H | 0.59046000  | -1.61924100 | 0.84169400  |
| H | 0.31104400  | -1.20054700 | -0.84715200 |
| O | 0.03434800  | 1.59992600  | -0.82616400 |
| O | 3.06208800  | -1.22843900 | 0.54483700  |
| O | 2.52190700  | 0.35708700  | -0.94862200 |
| H | 3.48713000  | 0.44749300  | -0.94695600 |
| H | -1.77412800 | 0.76945300  | 1.57600500  |
| O | 0.56151400  | 1.24479500  | 1.30934900  |
| H | 0.99434900  | 1.61759200  | -0.99815000 |

Cartesian coordinates for **TS33-34**

|   |             |             |             |
|---|-------------|-------------|-------------|
| C | 1.45320900  | -0.21596600 | -0.81416200 |
| N | 1.11724600  | 1.08839000  | -0.51548400 |
| H | 1.66500900  | 1.69981700  | -1.11736200 |
| N | 0.88265100  | -1.19948100 | 0.01229600  |
| O | 2.18329900  | -0.54335800 | -1.73264400 |
| C | -0.30547600 | -1.27746300 | 0.75049500  |
| C | -1.16131900 | -0.03852900 | 0.96999200  |
| C | -1.77243000 | 0.61810800  | -0.25459700 |
| H | -1.98961400 | -0.37597200 | 1.59690000  |
| H | -0.62686500 | 0.73214000  | 1.52521800  |
| O | -0.62023500 | -2.34716500 | 1.22276000  |
| O | -2.28007000 | 1.70611300  | -0.25524400 |
| O | -1.74443400 | -0.18959300 | -1.33866000 |
| H | -2.17616500 | 0.29265000  | -2.05979500 |
| H | 1.25902600  | -2.12081000 | -0.17845100 |
| H | 1.21382400  | 1.43888500  | 0.71369300  |
| N | 1.76151700  | 1.71758400  | 1.76003600  |
| H | 2.43182800  | 0.98608200  | 2.00323100  |
| H | 2.30068400  | 2.57688900  | 1.63857100  |

Cartesian coordinates for **TS34-35**

|   |            |             |             |
|---|------------|-------------|-------------|
| C | 0.93994100 | -1.22657600 | -0.09520000 |
|---|------------|-------------|-------------|

|   |             |             |             |
|---|-------------|-------------|-------------|
| N | -0.32609200 | -1.26867900 | -0.61996000 |
| H | -0.79169300 | -2.14806900 | -0.40706700 |
| N | 1.49484800  | 0.03441600  | 0.06575600  |
| O | 1.58269800  | -2.24628600 | 0.09976000  |
| C | 0.88078900  | 1.27227900  | -0.10771000 |
| C | -0.56461900 | 1.25394400  | -0.57211300 |
| C | -1.40290100 | 0.11252100  | 0.01863800  |
| H | -1.01434500 | 2.20162600  | -0.27378900 |
| H | -0.60033800 | 1.16467400  | -1.65842900 |
| O | 1.48901500  | 2.29766600  | 0.07959200  |
| O | -1.24171700 | 0.06975300  | 1.38603900  |
| H | 2.45551200  | 0.05808600  | 0.38362500  |
| O | -2.49878600 | -0.20790100 | -0.48637200 |
| H | -1.99936200 | -0.41533500 | 1.74124100  |

Cartesian coordinates for **TS35–36**

|   |             |             |             |
|---|-------------|-------------|-------------|
| C | 0.88353300  | 1.29451000  | 0.03953200  |
| N | -0.46226500 | 1.17709200  | 0.37356500  |
| H | -0.97737000 | 2.04726700  | 0.39549500  |
| N | 1.54598000  | 0.07947800  | -0.10617000 |
| O | 1.42914900  | 2.36043300  | -0.10974800 |
| C | 1.03369700  | -1.20178300 | 0.07779100  |
| C | -0.38728900 | -1.24837400 | 0.60342100  |
| C | -1.20392100 | -0.00267200 | 0.33549500  |
| H | -0.89512500 | -2.11684600 | 0.19243400  |
| H | -0.33412200 | -1.36993200 | 1.69160500  |
| O | 1.70219400  | -2.18405700 | -0.12823100 |
| O | -2.43902600 | 0.05403700  | 0.59893400  |
| H | 2.51235600  | 0.14662700  | -0.39949000 |
| O | -1.64328600 | -0.34766400 | -1.41649000 |
| H | -2.24011300 | 0.38481600  | -1.64497100 |

**Table S9. B3LYP/6–311G(d,p) cartesian coordinates of the optimized transition states for TAP mechanism.**

Cartesian coordinates for **37**

|   |             |             |             |
|---|-------------|-------------|-------------|
| C | 1.22216800  | 0.02458000  | 0.00000000  |
| C | -0.00000600 | 0.83197900  | 0.00000000  |
| H | -0.00004000 | 1.48247300  | 0.88073600  |
| H | -0.00003900 | 1.48247300  | -0.88073700 |
| C | -1.22215200 | 0.02455900  | 0.00000000  |
| N | 2.19534800  | -0.58940400 | 0.00000000  |
| N | -2.19534500 | -0.58940400 | 0.00000000  |

Cartesian coordinates for **20b**

|   |             |             |             |
|---|-------------|-------------|-------------|
| C | 0.11181300  | 0.00021200  | 0.00428300  |
| N | 0.81627400  | 1.13252100  | 0.01127000  |
| N | 0.82221300  | -1.12825400 | 0.01125900  |
| H | 0.19345100  | -1.93490800 | -0.05192200 |
| N | -1.28657700 | -0.00325800 | -0.07656300 |

|   |             |             |            |
|---|-------------|-------------|------------|
| H | -1.75338900 | -0.84461800 | 0.22791600 |
| H | -1.75754100 | 0.83542300  | 0.22891800 |
| H | 1.81386770  | 1.10037021  | 0.07269585 |

Cartesian coordinates for **38**

|   |             |             |             |
|---|-------------|-------------|-------------|
| C | 0.41824800  | 1.20984600  | 0.02927700  |
| C | 1.39463300  | 0.31820100  | 0.80201300  |
| H | 2.18874700  | 0.96066400  | 1.18608700  |
| H | 0.88033900  | -0.14528200 | 1.64718600  |
| C | 1.97446900  | -0.73664700 | -0.02322800 |
| N | 0.71461700  | 2.43122900  | -0.07826400 |
| N | 2.39918600  | -1.58595600 | -0.67677400 |
| N | -0.72979900 | 0.67524500  | -0.57264800 |
| H | -1.29010200 | 1.39914500  | -1.00824300 |
| C | -1.59284300 | -0.32473500 | -0.05435400 |
| N | -2.83572800 | -0.05401600 | -0.02785300 |
| H | -3.39578100 | -0.86768400 | 0.21920900  |
| N | -0.94582800 | -1.48245800 | 0.35850300  |
| H | -1.56554000 | -2.22157700 | 0.65650900  |
| H | -0.20185200 | -1.81355700 | -0.24372900 |

Cartesian coordinates for **39**

|   |             |             |             |
|---|-------------|-------------|-------------|
| C | 0.47890400  | 1.15515100  | 0.04537300  |
| C | 1.31378900  | 0.15317800  | 0.85179800  |
| H | 2.10790200  | 0.70480300  | 1.35834300  |
| H | 0.70158000  | -0.34000000 | 1.60993500  |
| C | 1.91539900  | -0.88318900 | 0.01683500  |
| N | 0.85137800  | 2.34422600  | -0.21471400 |
| N | 2.36293000  | -1.70684300 | -0.65433700 |
| N | -0.75850300 | 0.75199300  | -0.44996100 |
| H | -1.26529600 | 1.53836100  | -0.83856200 |
| C | -1.64301300 | -0.27041200 | -0.05341200 |
| N | -2.87915600 | 0.03073700  | 0.02167600  |
| H | -3.45551300 | -0.79373500 | 0.17874600  |
| N | -1.04086000 | -1.49767100 | 0.21115100  |
| H | -1.69249300 | -2.23937800 | 0.42185400  |
| H | -0.31957300 | -1.78805800 | -0.43760400 |
| H | 1.78239600  | 2.53255400  | 0.14701800  |

Cartesian coordinates for **40**

|   |             |             |             |
|---|-------------|-------------|-------------|
| C | 0.70913700  | 1.09373200  | 0.07371900  |
| C | 1.46516200  | -0.07936900 | 0.69922500  |
| H | 2.47949200  | 0.25498500  | 0.92624200  |
| H | 0.97747300  | -0.38573800 | 1.62627100  |
| C | 1.53720900  | -1.24730900 | -0.17623200 |
| N | 1.21738700  | 2.23147000  | -0.18284600 |
| N | 1.60780200  | -2.16150500 | -0.87413600 |
| N | -0.62370100 | 0.90785600  | -0.28077900 |
| H | -1.01170700 | 1.68417600  | -0.80008200 |

|   |             |             |             |
|---|-------------|-------------|-------------|
| C | -1.53963400 | -0.08039200 | 0.05092500  |
| N | -2.74510000 | 0.09465600  | -0.51700900 |
| H | -3.32238400 | -0.72983100 | -0.34358300 |
| N | -1.23063300 | -0.99709900 | 0.95364000  |
| H | 2.20629400  | 2.25702600  | 0.05190500  |
| H | -1.94069500 | -1.72824100 | 0.96133400  |

Cartesian coordinates for **41**

|   |             |             |             |
|---|-------------|-------------|-------------|
| C | -1.27343100 | 0.65543100  | -0.00089000 |
| C | -1.22006600 | -0.80986300 | -0.39012500 |
| H | -2.05719600 | -1.34984500 | 0.04841400  |
| H | -1.30599900 | -0.87385900 | -1.48103200 |
| C | 0.07993600  | -1.48684800 | 0.00343400  |
| N | -2.31975600 | 1.34029800  | 0.23134500  |
| N | 0.12120900  | -2.69807500 | 0.34681000  |
| N | -0.04277200 | 1.28825700  | 0.01696100  |
| H | -0.04774700 | 2.28760300  | 0.17046100  |
| C | 1.21703700  | 0.71140300  | -0.02440600 |
| N | 2.24297600  | 1.46347200  | 0.02333800  |
| H | 3.11121300  | 0.93549400  | -0.00667900 |
| N | 1.21752300  | -0.68608400 | -0.11662100 |
| H | 2.10134600  | -1.14064600 | 0.06136600  |
| H | -3.15674100 | 0.76544700  | 0.16655800  |

Cartesian coordinates for **42**

|   |             |             |             |
|---|-------------|-------------|-------------|
| C | -1.46133400 | -0.10134400 | 0.00342700  |
| C | -0.61288600 | -1.29908000 | -0.36799000 |
| H | -1.00551400 | -2.20578400 | 0.08812000  |
| H | -0.67587700 | -1.42298400 | -1.45641600 |
| C | 0.85047800  | -1.18324800 | -0.01156800 |
| N | -2.71090700 | -0.09330900 | 0.24396600  |
| N | 1.52441900  | -2.23325300 | 0.23218400  |
| N | -0.78001000 | 1.10509100  | -0.00762800 |
| H | -1.32967800 | 1.94263100  | 0.12746300  |
| C | 0.58975800  | 1.29943600  | -0.02409100 |
| N | 1.04941300  | 2.48791700  | 0.00403800  |
| H | 2.06594400  | 2.50598800  | -0.00864800 |
| N | 1.34550000  | 0.12006500  | -0.05183400 |
| H | 2.33838900  | 0.24050200  | 0.08676700  |
| H | -3.09407300 | -1.03471400 | 0.19149700  |
| H | 2.50580700  | -2.02580700 | 0.42747200  |

Cartesian coordinates for **43**

|   |             |             |             |
|---|-------------|-------------|-------------|
| C | -1.45868100 | -0.10450800 | -0.00357700 |
| C | -0.59219000 | -1.30226900 | 0.32566800  |
| H | -0.68334800 | -1.49404200 | 1.40219000  |
| H | -0.95252600 | -2.19303300 | -0.18766000 |
| C | 0.88001900  | -1.10719700 | 0.01905400  |
| N | -2.71332700 | -0.08828400 | -0.20851100 |

|   |             |             |             |
|---|-------------|-------------|-------------|
| N | 1.60856300  | -2.15859500 | -0.20253000 |
| N | -0.76373100 | 1.09535700  | -0.01017600 |
| H | -1.30443300 | 1.94204500  | -0.12442700 |
| C | 0.61318500  | 1.22493000  | 0.01374700  |
| N | 1.10532600  | 2.44007900  | 0.03479000  |
| H | 2.12228600  | 2.35386200  | 0.00750800  |
| N | 1.43282900  | 0.14054800  | -0.00492300 |
| H | -3.10055000 | -1.02831400 | -0.15466500 |
| H | 2.57695700  | -1.84999300 | -0.33284500 |

Cartesian coordinates for **44**

|   |             |             |             |
|---|-------------|-------------|-------------|
| C | 1.02894600  | -1.03992500 | 0.01676000  |
| C | 1.39185900  | 0.35524600  | 0.46723300  |
| H | 1.40676200  | 0.35415600  | 1.56534300  |
| H | 2.38590200  | 0.63134300  | 0.12015000  |
| C | 0.38192200  | 1.40249900  | 0.01966400  |
| N | 1.79107700  | -2.00886800 | -0.28908200 |
| N | 0.80397300  | 2.56155800  | -0.29492900 |
| N | -0.35104100 | -1.25625200 | -0.01033300 |
| H | -0.63699200 | -2.16897000 | -0.33878600 |
| C | -1.26396300 | -0.21604300 | 0.01606500  |
| N | -2.57758100 | -0.61012700 | -0.05242000 |
| H | -3.22866400 | 0.14736400  | 0.09100000  |
| N | -0.96613300 | 1.04035900  | 0.04663900  |
| H | 2.76815300  | -1.73088600 | -0.22039800 |
| H | -0.00001500 | 3.15131000  | -0.52380200 |
| H | -2.82979300 | -1.48167500 | 0.38902900  |

Cartesian coordinates for **45**

|   |             |             |             |
|---|-------------|-------------|-------------|
| C | 1.32277400  | -0.14113500 | -0.00789400 |
| C | 0.74132200  | 1.19926400  | -0.37194100 |
| H | 1.27805500  | 2.02851600  | 0.09062800  |
| H | 0.83756200  | 1.31537400  | -1.45958400 |
| C | -0.73547800 | 1.27591000  | -0.00986600 |
| N | 2.66094700  | -0.22350700 | 0.14107100  |
| N | -1.22611700 | 2.42706800  | 0.24245000  |
| N | 0.59967900  | -1.20816400 | 0.12043000  |
| C | -0.77765400 | -1.02427300 | -0.00668100 |
| N | -1.45156400 | -2.19962900 | -0.08681300 |
| H | -2.45501400 | -2.17127700 | -0.01989800 |
| N | -1.45322600 | 0.09239600  | -0.02801800 |
| H | 3.24243800  | 0.59530200  | 0.11129200  |
| H | -2.22825200 | 2.31614000  | 0.41614100  |
| H | -0.95648300 | -3.04651000 | 0.13307700  |
| H | 3.06788500  | -1.11328600 | 0.38280200  |

Cartesian coordinates for **46**

|   |            |             |            |
|---|------------|-------------|------------|
| C | 1.18796900 | -0.65263700 | 0.00000000 |
| C | 0.00070000 | -1.39459200 | 0.00000000 |



|   |             |             |             |
|---|-------------|-------------|-------------|
| H | 0.00101200  | -2.47729600 | 0.00000000  |
| C | -1.18740200 | -0.65346700 | 0.00000000  |
| N | 2.41199000  | -1.25469100 | 0.00000000  |
| N | -2.41066900 | -1.25702600 | 0.00000000  |
| N | 1.20194600  | 0.68993200  | 0.00000000  |
| C | -0.00056300 | 1.28131800  | 0.00000000  |
| N | -0.00132300 | 2.64327000  | 0.00000100  |
| H | -0.87702700 | 3.13300600  | -0.00000100 |
| N | -1.20265500 | 0.68908400  | 0.00000000  |
| H | 2.51108400  | -2.25273700 | -0.00000100 |
| H | -3.22744800 | -0.67186400 | 0.00000000  |
| H | 0.87353500  | 3.13448000  | -0.00000100 |
| H | 3.22772700  | -0.66807800 | 0.00000000  |
| H | -2.50813100 | -2.25522700 | 0.00000000  |

**Table S10. B3LYP/6-311G(d,p) cartesian coordinates of the optimized transition states for TAP mechanism.**

Cartesian coordinates for **TS37-38**

|   |             |             |             |
|---|-------------|-------------|-------------|
| C | 0.64170700  | 1.34965100  | 0.14301200  |
| C | 1.58756700  | 0.39036400  | 0.77568700  |
| H | 2.43750200  | 0.95846100  | 1.16234800  |
| H | 1.07663100  | -0.07634300 | 1.62383300  |
| C | 2.06764500  | -0.67270500 | -0.10313500 |
| N | 0.30297300  | 2.47094800  | 0.01633600  |
| N | 2.46035200  | -1.54612900 | -0.74260900 |
| N | -0.64159200 | 0.24374400  | -0.85723900 |
| H | -1.09779600 | 0.97557200  | -1.40306200 |
| C | -1.61473600 | -0.37753000 | -0.09993500 |
| N | -2.84668400 | 0.00764700  | -0.20198300 |
| H | -3.47961600 | -0.61898100 | 0.29891100  |
| N | -1.11322000 | -1.38812300 | 0.72203100  |
| H | -1.80831600 | -1.97675800 | 1.15745400  |
| H | -0.35430600 | -1.91723900 | 0.31099300  |

Cartesian coordinates for **TS38-39**

|   |             |             |             |
|---|-------------|-------------|-------------|
| C | -0.49268900 | -0.63281500 | -0.12961500 |
| C | -0.82958100 | 0.61440800  | 0.69343200  |
| H | -1.86855300 | 0.52523700  | 1.02052300  |
| H | -0.17643900 | 0.66667900  | 1.56767500  |
| C | -0.66740000 | 1.84677900  | -0.06935900 |
| N | -1.35578400 | -1.51285200 | -0.44571200 |
| N | -0.50780300 | 2.81486500  | -0.67550700 |
| N | 0.81383100  | -0.82459300 | -0.58839900 |
| H | 0.90614400  | -1.72239200 | -1.05016500 |
| C | 2.04694800  | -0.47246100 | 0.01211200  |
| N | 2.93287600  | -1.38569500 | 0.07570500  |
| H | 3.82925500  | -1.01828100 | 0.38933100  |
| N | 2.12867300  | 0.84019200  | 0.45661100  |

|   |             |             |             |
|---|-------------|-------------|-------------|
| H | 3.03825700  | 1.10568200  | 0.80440000  |
| H | 1.71550100  | 1.54373100  | -0.14319300 |
| H | -2.43295400 | -1.20344300 | -0.05458500 |
| N | -3.61787500 | -0.76406700 | 0.36373500  |
| H | -4.07518600 | -0.55263200 | -0.52962400 |
| H | -4.03711500 | -1.65499700 | 0.65118700  |

Cartesian coordinates for **TS39-40**

|   |             |             |             |
|---|-------------|-------------|-------------|
| C | -0.49268900 | -0.63281500 | -0.12961500 |
| C | -0.82958100 | 0.61440800  | 0.69343200  |
| H | -1.86855300 | 0.52523700  | 1.02052300  |
| H | -0.17643900 | 0.66667900  | 1.56767500  |
| C | -0.66740000 | 1.84677900  | -0.06935900 |
| N | -1.35578400 | -1.51285200 | -0.44571200 |
| N | -0.50780300 | 2.81486500  | -0.67550700 |
| N | 0.81383100  | -0.82459300 | -0.58839900 |
| H | 0.90614400  | -1.72239200 | -1.05016500 |
| C | 2.04694800  | -0.47246100 | 0.01211200  |
| N | 2.93287600  | -1.38569500 | 0.07570500  |
| H | 3.82925500  | -1.01828100 | 0.38933100  |
| N | 2.12867300  | 0.84019200  | 0.45661100  |
| H | 3.03825700  | 1.10568200  | 0.80440000  |
| H | 1.71550100  | 1.54373100  | -0.14319300 |
| H | -2.43295400 | -1.20344300 | -0.05458500 |
| N | -3.61787500 | -0.76406700 | 0.36373500  |
| H | -4.07518600 | -0.55263200 | -0.52962400 |
| H | -4.03711500 | -1.65499700 | 0.65118700  |

Cartesian coordinates for **TS40-41**

|   |             |             |             |
|---|-------------|-------------|-------------|
| C | -1.22229500 | -0.70776900 | 0.01531000  |
| C | -1.35203900 | 0.75030500  | 0.45633900  |
| H | -2.32364500 | 1.12580000  | 0.13168000  |
| H | -1.30188500 | 0.79579900  | 1.54770000  |
| C | -0.29511700 | 1.63150300  | -0.07792600 |
| N | -2.20537300 | -1.48315300 | -0.21227700 |
| N | 0.11989500  | 2.53930700  | -0.70068500 |
| N | 0.05722200  | -1.21829100 | -0.13177600 |
| H | 0.10080100  | -2.17261100 | -0.46389900 |
| C | 1.28326700  | -0.59732300 | 0.06007600  |
| N | 2.34968300  | -1.27497000 | -0.22804600 |
| H | 3.18655800  | -0.70327100 | -0.12718600 |
| N | 1.23393600  | 0.62477000  | 0.67630000  |
| H | -3.09338300 | -1.00083800 | -0.09871500 |
| H | 2.06112000  | 1.18118600  | 0.46301300  |

Cartesian coordinates for **TS41-42**

|   |             |             |            |
|---|-------------|-------------|------------|
| C | -1.25500500 | -0.65273100 | 0.02426900 |
| C | -1.32963300 | 0.80570000  | 0.45926800 |
| H | -2.29609400 | 1.18740700  | 0.13336700 |

|   |             |             |             |
|---|-------------|-------------|-------------|
| H | -1.27513400 | 0.85617200  | 1.55004000  |
| C | -0.24257400 | 1.64193000  | -0.08422800 |
| N | -2.35891700 | -1.24975900 | -0.18269800 |
| N | 0.21543100  | 2.52697600  | -0.71094500 |
| N | 0.00743900  | -1.22136900 | -0.10185100 |
| H | 0.05669000  | -2.17026000 | -0.44723100 |
| C | 1.26149700  | -0.63335200 | 0.06714300  |
| N | 2.29296200  | -1.35263500 | -0.23506900 |
| H | 3.15556900  | -0.81923500 | -0.14340700 |
| N | 1.25494400  | 0.59467000  | 0.67232000  |
| H | 2.09767400  | 1.12285400  | 0.44860700  |
| H | -2.22742400 | -2.23141600 | -0.43238000 |

Cartesian coordinates for **TS42-43**

|   |             |             |             |
|---|-------------|-------------|-------------|
| C | -0.58751400 | 1.45307800  | 0.02274800  |
| C | 0.68124600  | 0.74282400  | 0.43836000  |
| H | 1.53055300  | 1.28151500  | 0.02983800  |
| H | 0.74684800  | 0.79455100  | 1.53240000  |
| C | 0.74377900  | -0.72189600 | 0.05581300  |
| N | -0.54864600 | 2.70428200  | -0.20426000 |
| N | 1.76960600  | -1.41685600 | -0.20176700 |
| N | -1.71264100 | 0.64297100  | -0.00958000 |
| H | -2.62073300 | 1.05903900  | -0.16343700 |
| C | -1.74716900 | -0.74984400 | 0.00203300  |
| N | -2.88126200 | -1.32567700 | -0.07236000 |
| H | -2.79886600 | -2.33896500 | -0.06311200 |
| N | -0.50069100 | -1.36201900 | 0.08255700  |
| H | -0.47020900 | -2.35821500 | -0.08277300 |
| H | -1.46885900 | 3.07940900  | -0.44148100 |
| H | 2.83464500  | -0.90723800 | -0.17094400 |
| N | 3.89052500  | -0.09833400 | -0.11517800 |
| H | 3.76406000  | 0.59174600  | -0.86227000 |
| H | 3.82228000  | 0.44261300  | 0.75217300  |

Cartesian coordinates for **TS43-44**

|   |             |             |             |
|---|-------------|-------------|-------------|
| C | 0.17090900  | 1.40226100  | 0.01532300  |
| C | 1.58187700  | 0.97403100  | 0.39166600  |
| H | 2.29557500  | 1.67758200  | -0.03377500 |
| H | 1.66565800  | 1.03831600  | 1.48434400  |
| C | 1.91873300  | -0.44132800 | -0.00342700 |
| N | -0.01440800 | 2.64853100  | -0.21784700 |
| N | 3.05979600  | -0.93461100 | -0.28186200 |
| N | -0.81219800 | 0.43626300  | 0.01894200  |
| H | -2.37287900 | 0.52102000  | -0.02978400 |
| C | -0.51083700 | -0.88149000 | 0.03575500  |
| N | -1.48140200 | -1.77081900 | 0.04499200  |
| H | -1.15359200 | -2.72882900 | 0.06438400  |
| N | 0.82047600  | -1.29075900 | 0.01558800  |

|   |             |             |             |
|---|-------------|-------------|-------------|
| H | 1.02726500  | -2.25986300 | -0.18211700 |
| N | -3.36103800 | -0.01395200 | -0.03485500 |
| H | -3.92733900 | 0.18066700  | 0.78494500  |
| H | -3.89666400 | 0.13259700  | -0.88478300 |
| H | -2.85415100 | -1.00397900 | 0.00226400  |
| H | 3.77677600  | -0.21309600 | -0.23539900 |
| H | -1.00330500 | 2.81217700  | -0.42068700 |

Cartesian coordinates for **TS44-45**

|   |             |             |             |
|---|-------------|-------------|-------------|
| C | -0.52527000 | -0.94634000 | -0.20931400 |
| C | 0.90389400  | -1.37736100 | -0.45526400 |
| H | 1.10244300  | -2.37109800 | -0.05474500 |
| H | 1.04451000  | -1.42445700 | -1.54364900 |
| C | 1.91105200  | -0.38313800 | 0.09898700  |
| N | -1.51372100 | -1.79269400 | -0.09330800 |
| N | 3.02921500  | -0.82873500 | 0.52799100  |
| N | -0.77864700 | 0.38782600  | -0.15065200 |
| H | -2.27796100 | 0.53399900  | 0.19999500  |
| C | 0.29496100  | 1.24150300  | -0.10023300 |
| N | -0.05282000 | 2.57590900  | -0.12217500 |
| H | 0.72873900  | 3.19599300  | -0.27101300 |
| N | 1.56298500  | 0.95610900  | 0.03813500  |
| H | -1.20422300 | -2.75608000 | -0.15441400 |
| H | 3.59881600  | -0.02825000 | 0.81526300  |
| H | -0.89780900 | 2.80694800  | -0.62035100 |
| H | -2.84334400 | -0.96911900 | 0.24712600  |
| N | -3.27037300 | 0.03735400  | 0.41056900  |
| H | -3.99685100 | 0.27406900  | -0.25836100 |
| H | -3.59861300 | 0.17963100  | 1.36117300  |

Cartesian coordinates for **TS45-46**

|   |             |             |             |
|---|-------------|-------------|-------------|
| C | -0.39865600 | 1.32534000  | 0.15388200  |
| C | 0.78887900  | 0.58970100  | 0.46481300  |
| H | 1.92049800  | 0.56388100  | -0.53626200 |
| H | 1.43067700  | 1.01571600  | 1.23542900  |
| C | 0.63664100  | -0.87794500 | 0.49623500  |
| N | -0.38379000 | 2.69421500  | 0.17923000  |
| N | 1.70636400  | -1.60715100 | 0.70210800  |
| N | -1.53462700 | 0.76024800  | -0.22201600 |
| C | -1.55070800 | -0.60309300 | -0.15099400 |
| N | -2.74209600 | -1.16343100 | -0.51649400 |
| H | -2.87724000 | -2.13122000 | -0.27523600 |
| N | -0.58129600 | -1.43060700 | 0.19738600  |
| H | 0.33839400  | 3.15871700  | 0.70451000  |
| H | 1.44610100  | -2.59112800 | 0.65011200  |
| H | -3.54125500 | -0.55286000 | -0.54689500 |
| H | -1.28855000 | 3.13865700  | 0.15258800  |
| H | 2.85041400  | -0.79130900 | -0.29820500 |

|   |            |             |             |
|---|------------|-------------|-------------|
| N | 2.97701600 | 0.05882400  | -0.94349000 |
| H | 3.79886100 | 0.61114700  | -0.72493700 |
| H | 2.97416700 | -0.21030900 | -1.92179500 |
